# Supplementary material for: Influence of environmental factors on the spread of COVID-19 in Saudi Arabia
Source: PeerJ. 2022 Jan 6;10:e12732. doi: 10.7717/peerj.12732 (PMC8743009; doi:10.7717/peerj.12732)
Supplement: Supplemental Information 1 [file peerj-10-12732-s001.xlsx]

## Sheet: Zone A & B
Zone A															Zone B
cases	recovery	deaths	cases	recovery	deaths	cases	recovery	deaths	cases	recovery	deaths	cases	recovery	deaths	cases	recovery	deaths	cases	recovery	deaths	cases	recovery	deaths	cases	recovery	deaths	cases	recovery	deaths
0	0	0	0	0	0	2	0	0	0	0	0	0	0	0	2	0	0	0	0	0	0	0	0	0	0	0	0	0	0
0	0	0	1	0	0	0	1	0	0	0	0	0	0	0	0	0	0	0	0	0	0	0	0	0	0	0	0	0	0
0	0	0	0	0	0	0	0	0	0	0	0	0	0	0	1	0	0	0	0	0	0	0	0	0	0	0	0	0	0
0	0	0	0	0	0	1	0	0	0	0	0	0	0	0	0	0	0	0	0	0	0	0	0	0	0	0	0	0	0
0	0	0	0	1	0	2	0	0	0	0	0	0	0	0	1	1	0	0	0	0	0	0	0	0	0	0	0	0	0
0	0	0	0	0	0	0	0	0	0	0	0	0	0	0	0	0	0	0	0	0	0	0	0	0	0	0	0	0	0
0	0	0	0	0	0	0	0	0	0	0	0	0	0	0	1	1	0	0	0	0	0	0	0	0	0	0	0	0	0
0	0	0	0	0	0	1	0	0	0	0	0	0	0	0	0	0	0	0	0	0	0	0	0	0	0	0	0	0	0
0	0	0	0	0	0	2	0	0	0	0	0	0	0	0	0	0	0	0	0	0	0	0	0	0	0	0	0	0	0
0	0	0	0	0	0	0	0	0	0	0	0	0	0	0	0	1	0	0	0	0	0	0	0	0	0	0	0	0	0
0	0	0	0	0	0	2	0	0	0	0	0	0	0	0	1	1	0	0	0	0	0	0	0	0	0	0	0	0	0
0	0	0	0	0	0	0	0	0	0	0	0	0	0	0	1	2	0	0	0	0	0	0	0	0	0	0	0	0	0
0	0	0	0	0	0	3	0	0	0	0	0	0	0	0	0	1	0	0	0	0	0	0	0	0	0	0	0	0	0
0	0	0	0	0	0	1	0	0	0	0	0	0	0	0	1	0	0	0	0	0	0	0	0	0	0	0	0	0	0
0	0	0	0	0	0	0	1	0	0	0	0	0	0	0	2	1	0	0	0	0	0	0	0	0	0	0	0	0	0
0	0	0	0	0	0	0	4	0	0	0	0	0	0	0	2	0	0	0	0	0	0	0	0	0	0	0	0	0	0
0	0	0	0	0	0	2	1	0	0	0	0	0	0	0	3	0	0	0	0	0	0	0	0	0	0	0	0	0	0
0	0	0	0	0	0	2	2	0	0	0	0	0	0	0	7	1	0	0	0	0	0	0	0	0	0	0	0	0	0
0	0	0	0	0	0	1	2	0	1	0	0	0	0	0	9	0	0	0	0	0	0	0	0	0	0	0	0	0	0
0	0	0	0	0	0	3	1	0	0	0	0	0	0	0	9	0	0	0	0	0	0	0	0	0	0	0	0	0	0
0	0	0	0	0	0	2	4	0	0	0	0	0	0	0	0	1	0	0	0	0	0	0	0	0	0	0	0	0	0
0	0	0	0	0	0	1	0	0	0	0	0	0	0	0	15	0	0	0	0	0	0	0	0	2	0	0	0	0	0
0	0	0	0	0	0	0	0	0	12	0	0	0	0	0	6	0	0	0	0	0	0	0	0	8	0	0	0	0	0
0	0	0	2	0	0	0	0	0	0	0	0	0	0	0	1	0	0	0	0	0	0	0	0	4	0	0	0	0	0
0	0	0	0	0	0	0	1	0	0	0	0	0	0	0	3	0	0	0	0	0	0	0	0	0	0	0	0	0	0
0	0	0	0	0	0	6	1	0	0	0	0	0	0	0	5	8	0	0	0	0	0	0	0	0	0	0	0	0	0
0	0	0	0	0	0	2	0	0	0	0	0	0	0	0	3	6	0	0	0	0	0	0	0	0	0	0	0	0	0
0	0	0	0	0	0	2	0	0	0	0	0	0	0	0	0	9	0	0	0	0	0	0	0	0	0	0	0	0	0
0	0	0	0	0	0	2	0	0	0	0	0	0	0	0	17	8	0	0	0	0	0	0	0	0	0	0	0	0	0
0	0	0	0	0	0	4	4	0	0	0	0	0	0	0	5	11	0	0	0	0	0	0	0	0	0	0	0	0	0
0	0	0	0	0	0	2	2	0	0	0	0	0	0	0	10	3	0	0	0	0	0	0	0	0	1	0	0	0	0
0	0	0	0	2	0	0	1	0	0	0	0	0	0	0	1	4	0	0	0	0	0	0	0	0	13	0	0	0	0
0	0	0	0	0	0	0	1	0	0	0	0	0	0	0	1	0	0	0	0	0	0	0	0	3	0	0	0	0	0
0	0	0	0	0	0	3	2	0	0	4	0	0	0	0	5	3	0	0	0	0	0	0	0	0	1	0	0	0	0
0	0	0	0	0	0	3	0	0	1	0	0	0	0	0	2	1	0	0	0	0	0	0	0	0	0	0	0	0	0
0	0	0	0	0	0	0	1	0	0	0	0	0	0	0	3	11	0	0	0	0	0	0	0	3	1	0	4	0	0
0	0	0	0	0	0	3	2	0	0	0	0	0	0	0	4	0	0	0	0	0	0	0	0	4	0	0	1	0	0
0	0	0	0	0	0	1	1	0	1	0	0	0	0	0	4	13	0	0	0	0	0	0	0	1	0	0	0	0	0
0	0	0	1	0	0	2	0	0	0	0	0	0	0	0	2	13	0	0	0	0	0	0	0	0	0	0	0	0	0
0	0	0	0	0	0	4	1	0	0	0	0	0	0	0	0	0	0	0	0	0	0	0	0	0	0	0	0	0	0
0	0	0	0	0	0	1	4	0	0	0	0	0	0	0	18	4	0	0	0	0	0	0	0	0	0	0	0	0	0
0	0	0	8	0	0	0	1	0	0	0	0	0	0	0	14	1	0	0	0	0	0	0	0	1	0	0	0	0	0
0	0	0	0	0	0	1	1	0	1	0	0	0	0	0	21	5	0	0	0	0	0	0	0	0	0	0	0	0	0
0	0	0	5	0	0	2	0	0	2	0	0	0	0	0	0	2	0	0	0	0	0	0	0	0	1	0	0	0	0
0	0	0	0	0	0	0	2	0	0	10	0	0	0	0	23	4	0	0	0	0	0	0	0	0	3	0	0	0	0
0	0	0	0	0	0	0	1	0	0	0	0	0	0	0	1	3	0	0	0	0	0	0	0	1	0	0	0	0	0
0	0	0	0	0	0	1	0	0	0	0	0	0	0	0	5	4	0	0	0	0	0	0	0	0	3	0	0	2	0
0	0	0	0	0	0	1	0	0	1	0	0	0	0	0	21	2	0	0	0	0	0	0	0	0	0	0	0	0	0
0	0	0	0	0	0	0	0	0	0	0	0	0	0	0	4	7	0	0	0	0	0	0	0	3	0	0	0	2	0
0	0	0	2	0	0	0	1	0	1	0	0	0	0	0	22	0	0	0	0	0	1	0	0	0	0	0	0	0	0
0	0	0	0	1	0	0	7	0	0	1	0	0	0	0	8	7	0	0	0	0	0	0	0	0	0	0	1	0	0
0	0	0	1	0	0	0	2	0	1	0	0	0	0	0	18	4	0	0	0	0	0	0	0	1	2	0	0	0	0
1	0	0	2	0	0	0	0	0	0	0	0	1	0	0	4	18	0	1	0	0	5	0	0	0	0	0	0	0	0
0	0	0	5	3	0	0	0	0	6	4	0	0	0	0	4	0	0	0	0	0	0	1	0	0	1	0	0	1	0
0	0	0	1	0	0	1	2	0	0	0	0	0	0	0	6	12	0	0	0	0	0	0	0	0	0	0	0	0	0
0	0	0	0	0	0	0	1	0	5	0	0	0	0	0	25	1	0	0	0	0	1	0	0	0	0	0	0	0	0
0	0	0	0	0	0	6	1	0	0	3	0	0	0	0	17	11	0	0	0	0	1	0	0	0	0	0	0	0	0
0	0	0	0	1	0	2	0	0	0	6	0	0	0	0	20	4	0	0	0	0	0	1	0	0	0	0	1	0	0
1	0	0	0	0	0	2	0	0	1	0	0	0	0	0	10	16	0	0	0	0	0	2	0	0	0	0	0	0	0
1	0	0	1	0	0	2	0	0	0	0	0	1	0	0	1	4	0	0	0	0	0	0	0	0	0	0	0	0	0
0	0	0	1	0	0	4	4	0	0	0	0	3	0	0	2	8	0	0	0	0	0	0	0	0	0	0	0	0	0
0	0	0	0	0	0	2	2	0	10	0	0	1	0	0	5	34	0	0	0	0	0	0	0	0	0	0	0	0	0
0	0	0	4	2	0	0	1	0	0	0	0	0	0	0	6	3	0	1	0	0	0	0	0	1	1	0	0	1	0
0	1	0	0	3	0	0	1	0	0	0	0	0	0	0	4	2	0	0	0	0	0	0	0	0	0	0	0	0	0
3	0	0	1	8	0	3	2	0	0	0	0	0	0	0	1	8	0	0	0	0	0	0	0	0	2	0	0	0	0
0	0	0	0	0	0	3	0	0	0	0	0	0	0	0	0	24	0	0	0	0	0	0	0	0	0	0	0	0	0
0	0	0	1	0	0	0	1	0	0	0	0	1	4	0	0	30	0	0	1	0	0	4	0	0	0	0	0	0	0
0	1	0	0	3	0	3	2	0	1	0	0	0	0	0	3	12	0	0	0	0	0	0	0	0	0	0	0	0	0
3	0	0	0	2	0	1	1	0	2	2	0	1	0	0	1	3	0	1	0	0	0	0	0	1	0	0	0	0	0
0	0	0	0	0	0	2	0	0	0	0	0	0	0	0	9	1	0	0	0	0	0	0	0	1	0	0	0	0	0
0	0	0	0	0	0	4	1	0	0	0	0	0	0	0	9	7	0	0	1	0	1	0	0	5	2	0	0	0	0
0	0	0	0	0	0	1	4	0	0	0	0	0	0	0	11	4	0	0	0	0	0	0	0	1	0	0	2	0	0
0	0	0	0	0	0	0	1	0	0	4	0	0	0	0	11	2	0	0	0	0	0	0	0	0	0	0	3	0	0
2	0	0	2	4	0	1	1	0	0	2	0	1	0	0	11	10	0	0	0	0	1	0	0	0	0	0	0	0	0
0	0	1	1	0	0	2	0	0	0	1	0	0	1	0	14	0	0	0	0	0	1	0	0	0	0	0	0	0	0
0	0	0	0	0	0	0	2	0	0	0	0	0	0	0	8	1	0	0	1	0	0	0	0	1	0	0	1	0	0
0	1	0	2	2	0	0	1	0	0	0	0	0	0	0	9	0	0	0	0	0	0	0	0	0	0	0	9	0	0
0	0	0	3	7	0	1	0	0	1	0	0	0	0	0	5	0	0	1	0	0	0	0	0	9	1	0	2	0	0
2	0	0	17	0	0	1	0	0	2	3	0	0	2	0	9	0	0	0	0	0	3	0	0	3	1	0	19	0	0
0	3	0	0	0	0	0	0	0	1	0	0	1	0	0	15	7	0	0	0	0	0	0	0	8	0	0	1	0	0
0	3	0	3	0	0	0	1	0	0	0	0	0	0	0	13	17	0	0	0	0	0	0	0	15	2	0	8	1	0
0	0	0	0	0	0	0	7	0	2	2	0	1	1	0	11	7	0	0	0	0	0	0	0	0	0	0	1	4	0
0	0	0	0	0	0	0	2	0	1	1	0	0	0	0	13	5	0	0	0	0	0	1	0	0	0	0	4	0	0
0	1	0	4	0	0	0	0	0	0	0	0	0	0	0	13	0	0	0	0	0	0	3	0	4	1	0	5	3	0
0	0	0	5	0	0	0	0	0	0	0	0	1	0	0	21	20	0	0	1	0	2	2	0	3	0	0	3	1	0
0	0	0	1	0	0	1	2	0	10	3	0	0	0	0	11	2	0	0	0	0	0	0	0	5	1	0	2	5	0
0	0	0	2	0	0	0	0	0	0	2	0	0	0	0	15	6	0	0	0	0	0	2	0	5	1	0	1	1	0
0	0	0	0	0	0	1	1	0	0	0	0	0	0	0	10	2	0	0	0	0	0	0	0	9	0	0	3	0	0
0	1	0	2	0	0	0	0	0	0	2	0	2	1	0	4	1	0	0	0	0	3	0	0	4	6	0	5	7	0
0	1	0	0	15	0	1	0	0	7	1	0	0	1	0	8	1	0	0	0	0	0	0	0	8	4	0	2	2	0
0	0	0	6	6	0	0	0	0	0	0	0	0	0	0	7	11	0	0	0	0	0	3	0	8	5	0	5	3	0
0	0	0	0	10	0	1	0	0	2	1	0	2	0	0	12	4	0	0	0	0	0	0	0	16	0	0	2	5	0
0	0	0	0	1	0	1	1	0	0	0	0	0	0	0	6	14	0	0	0	0	0	0	0	8	2	0	4	4	0
0	0	0	0	2	0	1	0	0	0	6	0	1	0	0	8	0	0	0	0	0	1	0	0	10	4	0	5	2	0
0	0	0	12	3	0	0	1	0	0	1	0	0	0	0	8	15	0	0	0	0	0	0	0	9	0	0	0	0	0
0	0	0	7	1	0	1	0	0	1	1	1	1	1	0	11	5	0	1	0	0	2	0	0	10	3	0	3	7	0
1	0	0	16	0	0	1	1	0	2	0	0	0	0	0	2	14	0	0	0	0	0	0	0	18	3	0	1	8	0
0	0	0	13	3	1	0	3	0	2	0	0	1	1	0	4	1	0	2	0	0	0	0	0	9	26	0	5	12	0
0	0	0	0	2	1	0	0	0	2	5	0	0	0	0	10	5	0	0	1	0	0	3	0	9	4	0	0	0	0
0	0	0	1	0	1	0	0	0	6	1	0	0	0	0	9	4	0	0	0	0	6	0	0	17	21	0	2	11	0
1	0	0	6	0	0	0	0	0	2	4	0	0	1	0	4	7	0	1	0	0	0	0	0	19	15	0	6	4	0
2	0	0	14	0	0	4	0	0	8	3	0	1	1	0	18	2	0	2	0	0	0	0	0	21	11	0	8	2	0
0	0	0	0	0	0	0	2	0	2	3	0	1	2	0	10	17	0	0	0	0	0	0	0	16	6	0	0	4	0
1	0	0	2	1	0	0	1	0	0	1	0	0	1	0	16	26	0	0	0	0	0	0	0	53	9	0	5	1	0
2	1	0	6	24	0	0	1	0	20	0	0	1	0	0	12	8	0	1	0	0	3	1	0	24	3	0	12	1	0
2	0	0	2	13	0	0	0	0	5	5	0	2	1	0	17	7	0	2	0	0	0	1	0	24	28	0	12	5	0
0	0	0	3	19	1	1	0	0	17	1	0	2	0	0	13	3	0	0	0	0	1	0	1	39	2	1	7	1	0
0	0	0	3	5	1	0	0	0	7	5	0	3	0	0	24	3	0	2	0	0	3	0	0	51	12	0	13	0	0
4	2	0	3	9	1	1	1	0	10	9	0	7	1	0	9	12	0	0	0	0	10	0	0	35	19	0	8	5	0
1	1	0	3	5	0	3	3	0	4	4	1	9	0	0	4	8	0	3	0	0	4	0	0	58	24	0	10	5	0
0	1	0	1	2	0	0	0	0	8	0	0	9	0	0	0	4	0	1	0	0	3	0	0	69	21	0	2	3	0
0	1	0	3	7	1	1	0	0	2	10	0	0	1	0	19	5	0	0	1	0	3	7	0	25	18	0	20	2	0
1	0	0	0	2	0	0	0	0	0	3	2	15	0	0	25	33	0	0	4	0	0	0	0	70	33	0	3	11	0
1	2	0	3	0	0	0	0	0	22	0	0	6	0	0	9	10	0	2	1	0	7	1	0	48	30	0	13	12	0
5	2	0	3	6	0	0	0	0	7	3	0	1	0	0	17	64	0	2	2	0	28	6	0	16	42	0	1	8	0
8	1	0	5	0	0	2	0	0	19	1	0	3	0	0	11	30	0	1	2	0	15	8	0	86	38	0	28	4	0
0	0	0	3	6	0	0	3	0	4	8	0	5	8	0	5	17	0	3	1	0	7	0	0	46	30	0	20	12	0
2	4	0	7	0	2	0	1	0	8	5	0	3	6	0	20	13	0	2	4	0	2	4	0	90	0	0	18	0	0
0	1	0	4	3	1	0	1	0	3	3	1	0	9	0	21	24	0	1	0	0	0	7	1	39	0	0	8	0	0
5	0	0	3	1	0	1	3	0	3	33	0	17	8	0	0	8	0	0	0	0	2	10	0	88	75	0	26	12	0
8	0	0	2	0	1	0	0	0	6	9	0	5	11	0	0	15	0	0	0	0	1	4	0	64	1	0	4	0	0
0	0	0	0	0	0	0	5	0	9	11	0	10	3	0	12	14	0	0	1	0	0	3	0	45	122	0	22	19	0
7	0	0	45	0	2	0	0	0	6	8	0	1	4	0	0	0	0	6	1	0	17	4	0	61	50	0	28	13	0
2	2	0	10	1	3	0	1	1	0	1	0	1	0	0	0	0	0	2	0	0	19	2	1	90	46	0	32	12	0
7	4	0	15	0	0	0	1	0	2	11	0	5	3	0	0	0	0	2	0	0	19	0	0	39	10	1	23	0	0
4	0	0	61	0	1	0	1	0	5	0	0	2	1	0	0	0	0	2	0	0	30	5	1	133	3	0	29	13	0
2	0	0	9	3	1	0	0	0	2	8	1	3	11	0	0	0	0	4	4	0	8	9	0	102	51	0	19	3	0
0	0	0	21	0	1	0	0	0	7	12	1	4	0	0	0	0	0	2	2	0	8	4	0	66	44	0	39	1	0
4	2	0	10	5	0	0	0	0	2	7	0	4	13	0	0	0	0	0	1	0	8	7	1	71	37	0	11	24	0
2	3	0	9	1	0	0	0	0	2	2	0	2	13	0	0	0	0	0	1	0	27	2	0	26	15	0	23	1	0
4	0	0	66	0	0	0	0	0	14	0	0	0	0	0	0	0	0	3	2	0	44	1	0	48	59	0	0	20	0
1	0	0	10	1	0	0	0	0	3	10	0	18	4	0	0	0	0	3	0	0	12	0	0	94	36	0	27	29	0
7	0	0	22	1	1	0	0	0	4	3	0	14	1	0	0	0	0	0	1	0	23	25	0	115	43	1	15	1	0
21	3	0	9	14	0	0	0	0	1	1	0	21	5	0	0	0	0	3	2	0	14	7	0	28	69	0	24	32	0
1	3	0	16	12	1	0	0	0	3	1	0	0	2	0	0	0	0	1	1	0	27	7	0	46	76	0	18	24	0
0	1	0	37	4	1	0	0	0	4	1	0	23	4	0	0	0	0	2	0	0	9	16	0	61	66	0	10	24	0
0	10	0	16	50	0	0	0	0	4	3	0	1	3	0	0	0	0	4	1	0	9	2	0	26	61	0	15	21	0
10	8	0	12	62	0	0	0	0	2	2	0	5	4	0	0	0	0	1	4	0	15	5	0	49	36	0	21	18	0
16	2	0	19	37	0	0	0	0	2	1	0	21	2	0	0	0	0	0	1	0	7	21	0	44	34	0	12	25	0
12	6	0	19	20	0	0	0	0	3	1	0	4	7	0	0	0	0	1	1	0	43	6	1	48	70	0	19	19	0
0	14	0	9	27	1	0	0	0	2	10	1	22	0	0	0	0	0	2	0	0	25	0	1	71	58	0	8	24	0
7	0	0	6	8	1	0	0	0	4	2	0	8	7	0	0	0	0	0	2	0	22	3	1	70	91	0	4	10	0
3	0	0	6	19	0	0	0	0	2	1	1	18	4	0	0	0	0	0	1	0	22	14	0	26	69	0	26	10	0
0	8	0	1	15	0	0	0	0	0	0	1	4	18	0	0	0	0	1	0	0	2	2	0	69	26	0	11	15	0
0	16	0	2	7	1	0	0	0	1	0	0	4	0	0	0	0	0	1	0	0	3	5	0	80	44	0	17	15	0
0	4	0	2	14	0	0	1	0	3	1	1	6	12	0	0	0	0	0	0	0	0	3	0	23	25	0	24	21	0
1	7	0	3	15	0	1	0	0	2	1	0	25	1	0	0	0	0	0	1	0	6	20	0	69	53	0	2	12	0
2	0	0	6	12	0	0	0	0	1	1	0	17	11	0	0	0	0	0	7	0	3	67	0	33	37	0	11	6	0
1	0	0	10	13	0	0	0	0	3	3	0	20	4	0	0	0	0	0	2	0	5	0	0	39	68	0	23	15	0
2	0	0	12	11	0	0	0	0	1	2	1	10	16	0	0	0	0	0	0	0	1	1	2	63	77	0	11	8	0
1	0	0	7	15	0	0	0	0	4	2	1	1	4	0	0	0	0	0	0	0	7	69	1	29	48	0	10	24	0
0	16	0	3	3	0	0	0	0	0	2	1	2	8	0	0	0	0	1	2	0	0	3	1	41	45	0	8	2	0
0	0	0	9	1	0	0	0	0	1	3	1	5	34	0	0	0	0	0	0	0	2	5	1	35	54	1	1	3	0
0	0	0	5	3	0	0	0	0	8	2	0	6	3	0	0	0	0	1	1	0	8	2	0	43	24	0	16	16	0
0	1	0	2	10	0	0	0	0	2	4	0	4	2	0	0	0	0	0	0	0	4	1	1	28	32	1	7	7	0
1	1	0	3	5	0	0	0	0	6	1	0	1	8	0	0	0	0	1	0	0	10	3	0	47	35	0	13	14	0
0	2	0	7	10	0	0	0	0	4	1	1	0	24	0	0	0	0	0	0	0	4	6	0	59	44	0	2	41	0
0	1	0	2	4	0	0	0	0	1	1	0	0	30	0	0	0	0	1	0	0	2	7	0	28	28	0	14	9	0
41	1	0	10	4	3	0	0	0	2	0	1	3	12	0	0	0	0	1	1	0	3	1	0	27	20	0	7	7	0
0	0	0	10	8	1	0	0	0	5	5	0	1	3	0	0	0	0	1	0	0	1	5	1	9	43	1	0	17	0
0	1	0	1	5	0	0	0	0	6	3	0	9	1	0	0	0	0	0	1	0	0	5	1	18	42	1	9	10	0
0	3	0	0	4	1	0	0	0	3	2	0	9	7	0	0	0	0	1	0	0	4	24	0	19	26	0	15	9	0
13	4	0	19	17	1	0	0	0	2	6	0	11	4	0	0	0	0	1	1	0	1	23	0	23	94	0	18	24	0
3	6	0	11	9	3	0	0	0	0	2	0	11	2	0	0	0	0	0	3	0	14	34	1	24	77	0	10	25	0
1	14	0	8	30	2	0	0	0	5	16	0	11	10	0	0	0	0	0	0	0	5	13	1	25	145	1	6	24	0
0	12	0	9	2	2	0	0	0	0	1	0	14	0	0	0	0	0	0	0	0	0	1	0	19	50	1	7	3	0
3	9	0	6	8	2	0	0	0	0	4	1	8	1	0	1	0	0	0	0	0	1	14	0	24	49	1	0	12	0
1	3	0	2	2	1	0	0	0	0	1	0	9	0	0	0	0	0	4	0	0	1	0	1	29	21	0	14	11	0
0	0	0	14	8	2	0	0	0	2	1	1	5	0	0	0	0	0	0	2	0	1	4	1	29	211	0	18	30	0
3	10	0	4	0	4	0	0	0	1	0	0	9	0	0	0	0	0	0	1	0	0	2	0	22	38	0	5	16	0
1	3	0	3	10	0	0	0	0	0	4	0	15	7	0	0	0	0	0	1	0	0	10	0	12	26	0	21	7	0
1	0	0	1	9	1	0	0	0	5	6	0	13	17	0	0	0	0	0	0	0	5	0	1	29	17	0	5	10	0
0	0	0	1	3	1	0	0	0	1	4	2	11	7	0	0	0	0	1	0	0	1	0	0	28	15	0	10	7	0
1	4	0	9	11	1	0	0	0	4	3	0	13	5	0	1	0	0	0	0	0	0	1	0	17	17	0	10	12	0
2	5	0	6	7	1	0	0	0	3	1	1	13	0	0	3	0	0	1	1	0	2	0	0	16	12	1	0	3	0
0	0	0	5	3	0	0	0	0	2	3	1	21	20	0	1	0	0	3	3	0	1	2	0	20	21	0	13	13	0
0	0	0	1	5	2	0	0	0	2	1	0	11	2	0	0	0	0	0	0	0	0	1	0	17	30	0	8	9	0
0	0	0	3	4	1	0	0	0	6	0	0	15	6	0	0	0	0	1	0	0	1	0	0	11	18	0	11	12	0
2	1	0	5	0	0	0	0	0	1	1	0	10	2	0	0	0	0	0	0	0	2	4	0	14	12	0	5	13	0
0	1	0	7	4	1	0	0	0	5	0	0	4	1	0	0	0	0	0	0	0	5	2	0	11	11	0	7	1	0
3	0	0	10	5	0	0	0	0	3	1	0	8	1	0	1	4	0	0	0	0	8	0	0	10	23	0	6	18	0
5	0	0	9	3	0	0	0	0	4	3	1	7	11	0	0	0	0	2	0	0	7	0	0	21	32	0	0	12	0
1	0	0	7	2	1	0	0	0	1	1	1	12	4	0	1	0	0	0	3	0	1	1	0	23	13	0	15	5	0
13	1	0	21	2	0	0	0	0	17	2	0	6	14	0	0	0	0	0	1	0	10	2	0	34	12	1	3	4	0
0	0	0	1	2	0	0	0	0	2	3	2	8	0	0	0	0	0	0	1	0	0	0	0	10	15	0	5	6	0
19	0	1	35	1	1	0	0	0	2	2	1	8	15	0	0	0	0	1	3	0	0	10	0	9	17	0	2	7	0
19	5	2	10	4	0	0	0	0	1	3	0	11	5	0	0	0	0	0	0	0	0	1	0	13	6	0	3	9	0
2	0	0	8	8	1	0	0	0	9	2	1	2	14	0	1	0	0	0	5	0	0	28	0	10	9	0	4	7	0
15	2	0	14	5	2	0	0	0	0	3	1	4	1	0	0	1	0	0	0	0	0	7	0	12	10	0	2	10	0
0	2	0	18	5	0	0	0	0	5	1	0	10	5	0	0	0	0	0	1	1	0	7	2	8	10	0	6	6	1
17	1	0	33	8	1	0	0	0	4	5	0	9	4	0	0	0	0	0	1	0	0	1	1	6	28	0	6	5	0
3	14	0	25	30	0	1	0	0	5	11	0	4	7	0	0	0	0	0	1	0	0	9	0	7	17	0	3	12	0
0	8	0	8	7	0	0	0	0	5	2	2	18	2	0	0	2	0	0	0	0	0	0	0	12	26	0	5	5	0
1	14	0	5	12	0	0	0	0	2	2	1	10	17	0	1	0	0	0	0	0	0	0	0	4	9	0	6	4	0
1	3	0	19	7	0	0	0	0	0	3	0	16	26	0	0	0	0	0	0	0	0	0	0	9	11	0	2	1	0
0	5	0	4	15	2	0	0	0	2	7	0	12	8	0	1	1	0	0	0	0	0	0	0	13	14	0	3	4	0
1	1	0	14	6	0	0	0	0	0	3	0	17	7	0	0	0	0	0	0	0	0	0	0	19	27	0	10	15	0
4	0	0	13	1	0	0	0	0	4	1	0	13	3	0	0	0	0	0	0	0	0	0	0	6	7	0	3	3	0
0	0	0	18	10	0	0	0	0	2	2	0	24	3	0	1	0	0	0	0	0	0	0	0	10	6	0	1	6	0
3	15	0	9	17	0	0	0	0	3	2	0	9	12	0	0	0	0	0	0	0	0	0	0	14	5	0	0	6	0
0	2	0	3	17	0	0	0	0	0	3	1	4	8	0	0	0	0	0	0	0	0	0	0	2	5	0	1	3	0
2	0	0	2	6	0	1	0	0	3	3	1	0	4	0	0	0	0	0	0	0	0	0	0	2	9	0	6	6	0
0	1	0	7	6	1	0	0	0	3	1	0	19	5	0	2	1	0	0	0	0	0	0	0	10	37	0	2	15	0
2	0	0	8	9	0	0	0	0	1	9	0	25	33	0	0	1	0	0	0	0	0	0	2	16	28	1	5	1	1
0	2	0	9	4	0	0	0	0	2	1	0	9	10	0	0	0	0	0	0	0	0	0	0	3	10	0	1	4	0
2	1	1	3	23	0	0	1	0	1	0	0	17	64	0	2	0	0	0	0	0	0	0	0	14	44	1	2	17	0
1	2	0	11	4	0	0	0	0	0	3	0	11	30	0	0	0	0	0	0	0	0	0	0	4	4	0	1	0	0
3	0	1	2	13	0	1	0	0	0	4	1	5	17	0	1	0	0	0	0	0	0	0	0	7	36	0	0	2	0
2	3	0	6	7	0	0	0	0	0	3	1	20	13	0	0	0	0	0	0	0	0	0	1	3	4	0	1	0	0
2	0	0	15	5	0	0	1	0	1	0	0	21	24	0	1	1	0	0	0	0	0	0	0	6	6	2	0	1	0
4	6	1	4	9	0	0	0	0	2	2	0	0	8	0	0	0	0	0	0	0	0	0	0	13	8	0	4	10	0
0	0	0	6	4	0	0	0	0	1	0	0	0	15	0	1	1	0	0	1	0	0	1	0	6	17	0	2	0	0
3	0	0	11	0	0	0	0	0	0	0	0	12	14	0	0	0	0	1	0	0	0	0	0	8	2	2	2	1	0
0	0	0	0	0	0	0	0	0	0	0	0	0	0	0	0	0	0	0	0	0	0	0	0	0	0	0	0	0	0
0	0	0	0	0	0	0	1	0	0	0	0	0	0	0	0	1	0	0	0	0	0	0	0	0	0	0	0	0	0
0	0	0	0	0	0	0	0	0	0	0	0	0	0	0	1	1	0	0	0	0	0	0	0	0	0	0	0	0	0
0	0	0	0	0	0	1	0	0	0	0	0	0	0	0	1	2	0	0	0	0	0	0	0	0	0	0	0	0	0
0	0	0	0	0	0	0	0	0	0	0	0	0	0	0	0	1	0	0	0	0	0	0	0	0	0	0	0	0	0
0	0	0	0	0	0	0	0	0	0	0	0	0	0	0	1	0	0	0	0	0	0	0	0	0	0	0	0	0	0
0	0	0	0	0	0	0	0	0	0	0	0	0	0	0	2	1	0	0	0	0	0	0	0	0	0	0	0	0	0
0	0	0	0	0	0	0	0	0	0	0	0	0	0	0	2	0	0	0	0	0	0	0	0	0	0	0	0	0	0
0	0	0	0	0	0	0	0	0	0	0	0	0	0	0	3	0	0	0	0	0	0	0	0	0	0	0	0	0	0
0	0	0	0	0	0	0	0	0	0	0	0	0	0	0	7	1	0	0	0	0	0	0	0	0	0	0	0	0	0
0	0	0	0	0	0	0	1	0	1	0	0	0	0	0	9	0	0	0	0	0	0	0	0	0	0	0	0	0	0
0	0	0	0	0	0	0	0	0	0	0	0	0	0	0	9	0	0	0	0	0	0	0	0	0	0	0	0	0	0
0	0	0	0	0	0	0	0	0	0	0	0	0	0	0	0	1	0	0	0	0	0	0	0	0	0	0	0	0	0
0	0	0	0	0	0	0	0	0	0	0	0	0	0	0	15	0	0	0	0	0	0	0	0	2	0	0	0	0	0
0	0	0	0	0	0	0	0	0	12	0	0	0	0	0	6	0	0	0	0	0	0	0	0	8	0	0	0	0	0
0	0	0	2	0	0	0	0	0	0	0	0	0	0	0	1	0	0	0	0	0	0	0	0	4	0	0	0	0	0
0	0	0	0	0	0	0	0	0	0	0	0	0	0	0	3	0	0	0	0	0	0	0	0	0	0	0	0	0	0
0	0	0	0	0	0	0	0	0	0	0	0	0	0	0	5	8	0	0	0	0	0	0	0	0	0	0	0	0	0
0	0	0	0	0	0	0	0	0	0	0	0	0	0	0	3	6	0	0	0	0	0	0	0	0	0	0	0	0	0
0	0	0	0	0	0	0	0	0	0	0	0	0	0	0	0	9	0	0	0	0	0	0	0	0	0	0	0	0	0
0	0	0	0	0	0	0	0	0	0	0	0	0	0	0	17	8	0	0	0	0	0	0	0	0	0	0	0	0	0
0	0	0	0	0	0	0	0	0	0	0	0	0	0	0	5	11	0	0	0	0	0	0	0	0	0	0	0	0	0
0	0	0	0	0	0	0	0	0	0	0	0	0	0	0	10	3	0	0	0	0	0	0	0	0	1	0	0	0	0
0	0	0	0	2	0	0	0	0	0	0	0	0	0	0	1	4	0	0	0	0	0	0	0	0	13	0	0	0	0
0	0	0	0	0	0	0	0	0	0	0	0	0	0	0	1	0	0	0	0	0	0	0	0	3	0	0	0	0	0
0	0	0	0	0	0	0	0	0	0	4	0	0	0	0	5	3	0	0	0	0	0	0	0	0	1	0	0	0	0
0	0	0	0	0	0	0	0	0	1	0	0	0	0	0	2	1	0	0	0	0	0	0	0	0	0	0	0	0	0
0	0	0	0	0	0	0	0	0	0	0	0	0	0	0	3	11	0	0	0	0	0	0	0	3	1	0	4	0	0
0	0	0	0	0	0	0	0	0	0	0	0	0	0	0	4	0	0	0	0	0	0	0	0	4	0	0	1	0	0
0	0	0	0	0	0	0	0	0	1	0	0	0	0	0	4	13	0	0	0	0	0	0	0	1	0	0	0	0	0
0	0	0	1	0	0	0	0	0	0	0	0	0	0	0	2	13	0	0	0	0	0	0	0	0	0	0	0	0	0
0	0	0	0	0	0	0	0	0	0	0	0	0	0	0	0	0	0	0	0	0	0	0	0	0	0	0	0	0	0
0	0	0	0	0	0	0	0	0	0	0	0	0	0	0	18	4	0	0	0	0	0	0	0	0	0	0	0	0	0
0	0	0	8	0	0	0	0	0	0	0	0	0	0	0	14	1	0	0	0	0	0	0	0	1	0	0	0	0	0
0	0	0	0	0	0	0	0	0	1	0	0	0	0	0	21	5	0	0	0	0	0	0	0	0	0	0	0	0	0
0	0	0	5	0	0	0	0	0	2	0	0	0	0	0	0	2	0	0	0	0	0	0	0	0	1	0	0	0	0
0	0	0	0	0	0	0	0	0	0	10	0	0	0	0	23	4	0	0	0	0	0	0	0	0	3	0	0	0	0
0	0	0	0	0	0	0	0	0	0	0	0	0	0	0	1	3	0	0	0	0	0	0	0	1	0	0	0	0	0
0	0	0	0	0	0	0	0	0	0	0	0	0	0	0	5	4	0	0	0	0	0	0	0	0	3	0	0	2	0
0	0	0	0	0	0	0	0	0	1	0	0	0	0	0	21	2	0	0	0	0	0	0	0	0	0	0	0	0	0
0	0	0	0	0	0	0	0	0	0	0	0	0	0	0	4	7	0	0	0	0	0	0	0	3	0	0	0	2	0
0	0	0	2	0	0	0	0	0	1	0	0	0	0	0	22	0	0	0	0	0	1	0	0	0	0	0	0	0	0
0	0	0	0	1	0	0	0	0	0	1	0	0	0	0	8	7	0	0	0	0	0	0	0	0	0	0	1	0	0
0	0	0	1	0	0	0	0	0	1	0	0	0	0	0	18	4	0	0	0	0	0	0	0	1	2	0	0	0	0
1	0	0	2	0	0	0	0	0	0	0	0	1	0	0	4	18	0	1	0	0	5	0	0	0	0	0	0	0	0
0	0	0	5	3	0	0	0	0	6	4	0	0	0	0	4	0	0	0	0	0	0	1	0	0	1	0	0	1	0
0	0	0	1	0	0	0	0	0	0	0	0	0	0	0	6	12	0	0	0	0	0	0	0	0	0	0	0	0	0
0	0	0	0	0	0	0	0	0	5	0	0	0	0	0	25	1	0	0	0	0	1	0	0	0	0	0	0	0	0
0	0	0	0	0	0	0	0	0	0	3	0	0	0	0	17	11	0	0	0	0	1	0	0	0	0	0	0	0	0
0	0	0	0	1	0	0	0	0	0	6	0	0	0	0	20	4	0	0	0	0	0	1	0	0	0	0	1	0	0
1	0	0	0	0	0	0	0	0	1	0	0	0	0	0	10	16	0	0	0	0	0	2	0	0	0	0	0	0	0
1	0	0	1	0	0	0	0	0	0	0	0	1	0	0	1	4	0	0	0	0	0	0	0	0	0	0	0	0	0
0	0	0	1	0	0	0	0	0	0	0	0	3	0	0	2	0	0	0	0	0	0	0	0	0	0	0	0	0	0
0	0	0	0	0	0	0	0	0	10	0	0	1	0	0	0	0	0	0	0	0	0	0	0	0	0	0	0	0	0
0	0	0	4	2	0	0	0	0	0	0	0	0	0	0	1	0	0	1	0	0	0	0	0	1	1	0	0	1	0
0	1	0	0	3	0	1	0	0	0	0	0	0	0	0	0	0	0	0	0	0	0	0	0	0	0	0	0	0	0
3	0	0	1	8	0	0	0	0	0	0	0	0	0	0	1	1	0	0	0	0	0	0	0	0	2	0	0	0	0
0	0	0	0	0	0	0	0	0	0	0	0	0	0	0	0	0	0	0	0	0	0	0	0	0	0	0	0	0	0
0	0	0	1	0	0	0	0	0	0	0	0	1	4	0	1	1	0	0	1	0	0	4	0	0	0	0	0	0	0
0	1	0	0	3	0	0	0	0	1	0	0	0	0	0	0	0	0	0	0	0	0	0	0	0	0	0	0	0	0
3	0	0	0	2	0	0	0	0	2	2	0	1	0	0	0	0	0	1	0	0	0	0	0	1	0	0	0	0	0
0	0	0	0	0	0	0	0	0	0	0	0	0	0	0	0	1	0	0	0	0	0	0	0	1	0	0	0	0	0
0	0	0	0	0	0	0	0	0	0	0	0	0	0	0	1	1	0	0	1	0	1	0	0	5	2	0	0	0	0
0	0	0	0	0	0	0	0	0	0	0	0	0	0	0	1	2	0	0	0	0	0	0	0	1	0	0	2	0	0
0	0	0	0	0	0	0	0	0	0	4	0	0	0	0	0	1	0	0	0	0	0	0	0	0	0	0	3	0	0
2	0	0	2	4	0	1	0	0	0	2	0	1	0	0	1	0	0	0	0	0	1	0	0	0	0	0	0	0	0
0	0	1	1	0	0	0	0	0	0	1	0	0	1	0	2	1	0	0	0	0	1	0	0	0	0	0	0	0	0
0	0	0	0	0	0	0	0	0	0	0	0	0	0	0	2	0	0	0	1	0	0	0	0	1	0	0	1	0	0
0	1	0	2	2	0	0	0	0	0	0	0	0	0	0	3	0	0	0	0	0	0	0	0	0	0	0	9	0	0
0	0	0	3	7	0	0	1	0	1	0	0	0	0	0	7	1	0	1	0	0	0	0	0	9	1	0	2	0	0
2	0	0	17	0	0	0	0	0	2	3	0	0	2	0	9	0	0	0	0	0	3	0	0	3	1	0	19	0	0
0	3	0	0	0	0	1	0	0	1	0	0	1	0	0	9	0	0	0	0	0	0	0	0	8	0	0	1	0	0
0	3	0	3	0	0	0	0	0	0	0	0	0	0	0	0	1	0	0	0	0	0	0	0	15	2	0	8	1	0
0	0	0	0	0	0	0	1	0	2	2	0	1	1	0	15	0	0	0	0	0	0	0	0	0	0	0	1	4	0
0	0	0	0	0	0	0	0	0	1	1	0	0	0	0	6	0	0	0	0	0	0	1	0	0	0	0	4	0	0
0	1	0	4	0	0	0	0	0	0	0	0	0	0	0	1	0	0	0	0	0	0	3	0	4	1	0	5	3	0
0	0	0	5	0	0	0	0	0	0	0	0	1	0	0	3	0	0	0	1	0	2	2	0	3	0	0	3	1	0
0	0	0	1	0	0	0	0	0	10	3	0	0	0	0	5	8	0	0	0	0	0	0	0	5	1	0	2	5	0
0	0	0	2	0	0	0	1	0	0	2	0	0	0	0	3	6	0	0	0	0	0	2	0	5	1	0	1	1	0
0	0	0	0	0	0	0	0	0	0	0	0	0	0	0	0	9	0	0	0	0	0	0	0	9	0	0	3	0	0
0	1	0	2	0	0	1	0	0	0	2	0	2	1	0	17	8	0	0	0	0	3	0	0	4	6	0	5	7	0
0	1	0	0	15	0	0	0	0	7	1	0	0	1	0	5	11	0	0	0	0	0	0	0	8	4	0	2	2	0
0	0	0	6	6	0	0	0	0	0	0	0	0	0	0	10	3	0	0	0	0	0	3	0	8	5	0	5	3	0
0	0	0	0	10	0	0	0	0	2	1	0	2	0	0	1	4	0	0	0	0	0	0	0	16	0	0	2	5	0
0	0	0	0	1	0	0	0	0	0	0	0	0	0	0	1	0	0	0	0	0	0	0	0	8	2	0	4	4	0
0	0	0	0	2	0	0	0	0	0	6	0	1	0	0	5	3	0	0	0	0	1	0	0	10	4	0	5	2	0
0	0	0	12	3	0	0	0	0	0	1	0	0	0	0	2	1	0	0	0	0	0	0	0	9	0	0	0	0	0
0	0	0	7	1	0	0	1	0	1	1	1	1	1	0	3	11	0	1	0	0	2	0	0	10	3	0	3	7	0
1	0	0	16	0	0	0	0	0	2	0	0	0	0	0	4	0	0	0	0	0	0	0	0	18	3	0	1	8	0
0	0	0	13	3	1	0	0	0	2	0	0	1	1	0	4	13	0	2	0	0	0	0	0	9	26	0	5	12	0
0	0	0	0	2	1	0	0	0	2	5	0	0	0	0	2	13	0	0	1	0	0	3	0	9	4	0	0	0	0
0	0	0	1	0	1	0	0	0	6	1	0	0	0	0	0	0	0	0	0	0	6	0	0	17	21	0	2	11	0
1	0	0	6	0	0	0	0	0	2	4	0	0	1	0	18	4	0	1	0	0	0	0	0	19	15	0	6	4	0
2	0	0	14	0	0	0	0	0	8	3	0	1	1	0	14	1	0	2	0	0	0	0	0	21	11	0	8	2	0
0	0	0	0	0	0	0	0	0	2	3	0	1	2	0	21	5	0	0	0	0	0	0	0	16	6	0	0	4	0
1	0	0	2	1	0	0	0	0	0	1	0	0	1	0	0	2	0	0	0	0	0	0	0	53	9	0	5	1	0
2	1	0	6	24	0	0	0	0	20	0	0	1	0	0	23	4	0	1	0	0	3	1	0	24	3	0	12	1	0
2	0	0	2	13	0	0	0	0	5	5	0	2	1	0	1	3	0	2	0	0	0	1	0	24	28	0	12	5	0
0	0	0	3	19	1	1	0	0	17	1	0	2	0	0	5	4	0	0	0	0	1	0	1	39	2	1	7	1	0
0	0	0	3	5	1	0	0	0	7	5	0	3	0	0	21	2	0	2	0	0	3	0	0	51	12	0	13	0	0
4	2	0	3	9	1	2	0	0	10	9	0	7	1	0	4	7	0	0	0	0	10	0	0	35	19	0	8	5	0
1	1	0	3	5	0	0	1	0	4	4	1	9	0	0	22	0	0	3	0	0	4	0	0	58	24	0	10	5	0
0	1	0	1	2	0	0	0	0	8	0	0	9	0	0	8	7	0	1	0	0	3	0	0	69	21	0	2	3	0
0	1	0	3	7	1	1	0	0	2	10	0	0	1	0	18	4	0	0	1	0	3	7	0	25	18	0	20	2	0
1	0	0	0	2	0	2	0	0	0	3	2	15	0	0	4	18	0	0	4	0	0	0	0	70	33	0	3	11	0
1	2	0	3	0	0	0	0	0	22	0	0	6	0	0	4	0	0	2	1	0	7	1	0	48	30	0	13	12	0
5	2	0	3	6	0	0	0	0	7	3	0	1	0	0	6	12	0	2	2	0	28	6	0	16	42	0	1	8	0
8	1	0	5	0	0	1	0	0	19	1	0	3	0	0	25	1	0	1	2	0	15	8	0	86	38	0	28	4	0
0	0	0	3	6	0	2	0	0	4	8	0	5	8	0	17	11	0	3	1	0	7	0	0	46	30	0	20	12	0
2	4	0	7	0	2	0	0	0	8	5	0	3	6	0	20	4	0	2	4	0	2	4	0	90	0	0	18	0	0
0	1	0	4	3	1	2	0	0	3	3	1	0	9	0	10	16	0	1	0	0	0	7	1	39	0	0	8	0	0
5	0	0	3	1	0	0	0	0	3	33	0	17	8	0	1	4	0	0	0	0	2	10	0	88	75	0	26	12	0
8	0	0	2	0	1	3	0	0	6	9	0	5	11	0	2	8	0	0	0	0	1	4	0	64	1	0	4	0	0
0	0	0	0	0	0	1	0	0	9	11	0	10	3	0	10	3	0	0	1	0	0	3	0	45	122	0	22	19	0
7	0	0	45	0	2	0	1	0	6	8	0	1	4	0	1	4	0	6	1	0	17	4	0	61	50	0	28	13	0
2	2	0	10	1	3	0	4	0	0	1	0	1	0	0	1	0	0	2	0	0	19	2	1	90	46	0	32	12	0
7	4	0	15	0	0	2	1	0	2	11	0	5	3	0	5	3	0	2	0	0	19	0	0	39	10	1	23	0	0
4	0	0	61	0	1	2	2	0	5	0	0	2	1	0	2	1	0	2	0	0	30	5	1	133	3	0	29	13	0
2	0	0	9	3	1	1	2	0	2	8	1	3	11	0	3	11	0	4	4	0	8	9	0	102	51	0	19	3	0
0	0	0	21	0	1	3	1	0	7	12	1	4	0	0	4	0	0	2	2	0	8	4	0	66	44	0	39	1	0
4	2	0	10	5	0	2	4	0	2	7	0	4	13	0	4	13	0	0	1	0	8	7	1	71	37	0	11	24	0
2	3	0	9	1	0	1	0	0	2	2	0	2	13	0	2	13	0	0	1	0	27	2	0	26	15	0	23	1	0
4	0	0	66	0	0	0	0	0	14	0	0	0	0	0	0	0	0	3	2	0	44	1	0	48	59	0	0	20	0
1	0	0	10	1	0	0	0	0	3	10	0	18	4	0	18	4	0	3	0	0	12	0	0	94	36	0	27	29	0
7	0	0	22	1	1	0	1	0	4	3	0	14	1	0	14	1	0	0	1	0	23	25	0	115	43	1	15	1	0
21	3	0	9	14	0	6	1	0	1	1	0	21	5	0	21	5	0	3	2	0	14	7	0	28	69	0	24	32	0
1	3	0	16	12	1	2	0	0	3	1	0	0	2	0	0	2	0	1	1	0	27	7	0	46	76	0	18	24	0
0	1	0	37	4	1	2	0	0	4	1	0	23	4	0	23	4	0	2	0	0	9	16	0	61	66	0	10	24	0
0	10	0	16	50	0	2	0	0	4	3	0	1	3	0	1	3	0	4	1	0	9	2	0	26	61	0	15	21	0
10	8	0	12	62	0	4	4	0	2	2	0	5	4	0	5	4	0	1	4	0	15	5	0	49	36	0	21	18	0
16	2	0	19	37	0	2	2	0	2	1	0	21	2	0	21	2	0	0	1	0	7	21	0	44	34	0	12	25	0
12	6	0	19	20	0	0	1	0	3	1	0	4	7	0	4	7	0	1	1	0	43	6	1	48	70	0	19	19	0
0	14	0	9	27	1	0	1	0	2	10	1	22	0	0	0	0	0	2	0	0	25	0	1	71	58	0	8	24	0
7	0	0	6	8	1	3	2	0	4	2	0	8	7	0	0	0	0	0	2	0	22	3	1	70	91	0	4	10	0
3	0	0	6	19	0	3	0	0	2	1	1	18	4	0	2	1	0	0	1	0	22	14	0	26	69	0	26	10	0
0	8	0	1	15	0	0	1	0	0	0	1	4	18	0	0	1	0	1	0	0	2	2	0	69	26	0	11	15	0
0	16	0	2	7	1	3	2	0	1	0	0	4	0	0	0	0	0	1	0	0	3	5	0	80	44	0	17	15	0
0	4	0	2	14	0	1	1	0	3	1	1	6	12	0	2	0	0	0	0	0	0	3	0	23	25	0	24	21	0
1	7	0	3	15	0	2	0	0	2	1	0	25	1	0	0	0	0	0	1	0	6	20	0	69	53	0	2	12	0
2	0	0	6	12	0	4	1	0	1	1	0	17	11	0	1	0	0	0	7	0	3	67	0	33	37	0	11	6	0
1	0	0	10	13	0	1	4	0	3	3	0	20	4	0	0	0	0	0	2	0	5	0	0	39	68	0	23	15	0
2	0	0	12	11	0	0	1	0	1	2	1	10	16	0	1	1	0	0	0	0	1	1	2	63	77	0	11	8	0
1	0	0	7	15	0	1	1	0	4	2	1	1	4	0	0	0	0	0	0	0	7	69	1	29	48	0	10	24	0
0	0	0	0	10	0	2	0	0	2	1	0	2	0	0	1	1	0	0	0	0	0	0	0	16	0	0	2	5	0
0	0	0	0	1	0	0	2	0	0	0	0	0	0	0	0	0	0	0	0	0	0	0	0	8	2	0	4	4	0
0	0	0	0	2	0	0	1	0	0	6	0	1	0	0	0	0	0	0	0	0	1	0	0	10	4	0	5	2	0
0	0	0	12	3	0	1	0	0	0	1	0	0	0	0	0	1	0	0	0	0	0	0	0	9	0	0	0	0	0
0	0	0	7	1	0	1	0	0	1	1	1	1	1	0	1	1	0	1	0	0	2	0	0	10	3	0	3	7	0
1	0	0	16	0	0	0	0	0	2	0	0	0	0	0	1	2	0	0	0	0	0	0	0	18	3	0	1	8	0
0	0	0	13	3	1	0	1	0	2	0	0	1	1	0	0	1	0	2	0	0	0	0	0	9	26	0	5	12	0
0	0	0	0	2	1	0	7	0	2	5	0	0	0	0	1	0	0	0	1	0	0	3	0	9	4	0	0	0	0
0	0	0	1	0	1	0	2	0	6	1	0	0	0	0	2	1	0	0	0	0	6	0	0	17	21	0	2	11	0
1	0	0	6	0	0	0	0	0	2	4	0	0	1	0	2	0	0	1	0	0	0	0	0	19	15	0	6	4	0

## Sheet: Zone C & D
Zone C															Zone D
cases	recovery	deaths	cases	recovery	deaths	cases	recovery	deaths	cases	recovery	deaths	cases	recovery	deaths	cases	recovery	deaths	cases	recovery	deaths	cases	recovery	deaths	cases	recovery	deaths	cases	recovery	deaths
0	0	0	13	3	1	4	3	0	2	0	0	1	1	0	13	4	0	2	0	0	0	0	0	9	26	0	5	12	0
0	0	0	0	2	1	13	1	0	2	5	0	0	0	0	5	3	0	0	1	0	0	3	0	9	4	0	0	0	0
0	0	0	1	0	1	18	2	0	6	1	0	0	0	0	20	9	0	0	0	0	6	0	0	17	21	0	2	11	0
1	0	0	6	0	0	50	5	0	2	4	0	0	1	0	20	3	0	1	0	0	0	0	0	19	15	0	6	4	0
2	0	0	14	0	0	28	1	0	8	3	0	1	1	0	1	8	1	2	0	0	0	0	0	21	11	0	8	2	0
0	0	0	0	0	0	39	2	0	2	3	0	1	2	0	6	5	0	0	0	0	0	0	0	16	6	0	0	4	0
1	0	0	2	1	0	9	3	0	0	1	0	0	1	0	15	1	0	0	0	0	0	0	0	53	9	0	5	1	0
2	1	0	6	24	0	53	13	0	20	0	0	1	0	0	9	0	0	1	0	0	3	1	0	24	3	0	12	1	0
2	0	0	2	13	0	55	0	0	5	5	0	2	1	0	14	49	2	2	0	0	0	1	0	24	28	0	12	5	0
0	0	0	3	19	1	77	7	0	17	1	0	2	0	0	6	0	0	0	0	0	1	0	1	39	2	1	7	1	0
0	0	0	3	5	1	58	10	0	7	5	0	3	0	0	3	2	0	2	0	0	3	0	0	51	12	0	13	0	0
4	2	0	3	9	1	99	23	0	10	9	0	7	1	0	10	0	0	0	0	0	10	0	0	35	19	0	8	5	0
1	1	0	3	5	0	28	11	0	4	4	1	9	0	0	14	62	0	3	0	0	4	0	0	58	24	0	10	5	0
0	1	0	1	2	0	110	46	0	8	0	0	9	0	0	19	3	0	1	0	0	3	0	0	69	21	0	2	3	0
0	1	0	3	7	1	59	45	0	2	10	0	0	1	0	11	10	1	0	1	0	3	7	0	25	18	0	20	2	0
1	0	0	0	2	0	79	31	1	0	3	2	15	0	0	17	6	1	0	4	0	0	0	0	70	33	0	3	11	0
1	2	0	3	0	0	91	41	2	22	0	0	6	0	0	2	0	0	2	1	0	7	1	0	48	30	0	13	12	0
5	2	0	3	6	0	45	28	2	7	3	0	1	0	0	9	9	1	2	2	0	28	6	0	16	42	0	1	8	0
8	1	0	5	0	0	46	39	0	19	1	0	3	0	0	28	2	0	1	2	0	15	8	0	86	38	0	28	4	0
0	0	0	3	6	0	58	2	0	4	8	0	5	8	0	16	18	0	3	1	0	7	0	0	46	30	0	20	12	0
2	4	0	7	0	2	234	13	0	8	5	0	3	6	0	20	16	0	2	4	0	2	4	0	90	0	0	18	0	0
0	1	0	4	3	1	120	19	0	3	3	1	0	9	0	8	0	1	1	0	0	0	7	1	39	0	0	8	0	0
5	0	0	3	1	0	166	121	0	3	33	0	17	8	0	5	23	1	0	0	0	2	10	0	88	75	0	26	12	0
8	0	0	2	0	1	144	35	0	6	9	0	5	11	0	8	3	1	0	0	0	1	4	0	64	1	0	4	0	0
0	0	0	0	0	0	78	106	0	9	11	0	10	3	0	9	28	1	0	1	0	0	3	0	45	122	0	22	19	0
7	0	0	45	0	2	81	62	1	6	8	0	1	4	0	11	6	0	6	1	0	17	4	0	61	50	0	28	13	0
2	2	0	10	1	3	60	60	1	0	1	0	1	0	0	13	11	1	2	0	0	19	2	1	90	46	0	32	12	0
7	4	0	15	0	0	125	29	0	2	11	0	5	3	0	17	0	0	2	0	0	19	0	0	39	10	1	23	0	0
4	0	0	61	0	1	177	41	0	5	0	0	2	1	0	17	26	0	2	0	0	30	5	1	133	3	0	29	13	0
2	0	0	9	3	1	65	30	0	2	8	1	3	11	0	6	10	0	4	4	0	8	9	0	102	51	0	19	3	0
0	0	0	21	0	1	73	30	0	7	12	1	4	0	0	14	1	1	2	2	0	8	4	0	66	44	0	39	1	0
4	2	0	10	5	0	89	192	0	2	7	0	4	13	0	13	0	1	0	1	0	8	7	1	71	37	0	11	24	0
2	3	0	9	1	0	96	74	0	2	2	0	2	13	0	35	0	0	0	1	0	27	2	0	26	15	0	23	1	0
4	0	0	66	0	0	94	62	0	14	0	0	0	0	0	10	0	0	3	2	0	44	1	0	48	59	0	0	20	0
1	0	0	10	1	0	51	7	1	3	10	0	18	4	0	14	0	0	3	0	0	12	0	0	94	36	0	27	29	0
7	0	0	22	1	1	95	5	0	4	3	0	14	1	0	32	0	0	0	1	0	23	25	0	115	43	1	15	1	0
21	3	0	9	14	0	123	208	0	1	1	0	21	5	0	29	30	2	3	2	0	14	7	0	28	69	0	24	32	0
1	3	0	16	12	1	141	290	0	3	1	0	0	2	0	23	22	1	1	1	0	27	7	0	46	76	0	18	24	0
0	1	0	37	4	1	81	296	0	4	1	0	23	4	0	63	11	1	2	0	0	9	16	0	61	66	0	10	24	0
0	10	0	16	50	0	69	167	1	4	3	0	1	3	0	43	20	0	4	1	0	9	2	0	26	61	0	15	21	0
10	8	0	12	62	0	74	50	0	2	2	0	5	4	0	46	0	0	1	4	0	15	5	0	49	36	0	21	18	0
16	2	0	19	37	0	44	85	0	2	1	0	21	2	0	29	1	0	0	1	0	7	21	0	44	34	0	12	25	0
12	6	0	19	20	0	18	115	0	3	1	0	4	7	0	10	41	1	1	1	0	43	6	1	48	70	0	19	19	0
0	14	0	9	27	1	29	202	0	2	10	1	22	0	0	44	35	0	2	0	0	25	0	1	71	58	0	8	24	0
7	0	0	6	8	1	67	159	0	4	2	0	8	7	0	79	30	1	0	2	0	22	3	1	70	91	0	4	10	0
3	0	0	6	19	0	53	74	0	2	1	1	18	4	0	67	46	0	0	1	0	22	14	0	26	69	0	26	10	0
0	8	0	1	15	0	52	17	0	0	0	1	4	18	0	41	24	2	1	0	0	2	2	0	69	26	0	11	15	0
0	16	0	2	7	1	40	40	0	1	0	0	4	0	0	34	2	1	1	0	0	3	5	0	80	44	0	17	15	0
0	4	0	2	14	0	33	11	0	3	1	1	6	12	0	36	48	1	0	0	0	0	3	0	23	25	0	24	21	0
1	7	0	3	15	0	27	51	0	2	1	0	25	1	0	35	32	0	0	1	0	6	20	0	69	53	0	2	12	0
2	0	0	6	12	0	42	14	0	1	1	0	17	11	0	44	33	1	0	7	0	3	67	0	33	37	0	11	6	0
1	0	0	10	13	0	32	248	0	3	3	0	20	4	0	51	12	0	0	2	0	5	0	0	39	68	0	23	15	0
2	0	0	12	11	0	49	80	0	1	2	1	10	16	0	28	36	1	0	0	0	1	1	2	63	77	0	11	8	0
1	0	0	7	15	0	32	51	0	4	2	1	1	4	0	58	87	0	0	0	0	7	69	1	29	48	0	10	24	0
0	16	0	3	3	0	45	9	0	0	2	1	2	8	0	32	0	0	1	2	0	0	3	1	41	45	0	8	2	0
0	0	0	0	0	0	78	106	0	9	11	0	10	3	0	9	28	1	0	1	0	0	3	0	45	122	0	22	19	0
7	0	0	45	0	2	81	62	1	6	8	0	1	4	0	11	6	0	6	1	0	17	4	0	61	50	0	28	13	0
2	2	0	10	1	3	60	60	1	0	1	0	1	0	0	13	11	1	2	0	0	19	2	1	90	46	0	32	12	0
7	4	0	15	0	0	125	29	0	2	11	0	5	3	0	17	0	0	2	0	0	19	0	0	39	10	1	23	0	0
4	0	0	61	0	1	177	41	0	5	0	0	2	1	0	17	26	0	2	0	0	30	5	1	133	3	0	29	13	0
2	0	0	9	3	1	65	30	0	2	8	1	3	11	0	6	10	0	4	4	0	8	9	0	102	51	0	19	3	0
0	0	0	21	0	1	73	30	0	7	12	1	4	0	0	14	1	1	2	2	0	8	4	0	66	44	0	39	1	0
4	2	0	10	5	0	89	192	0	2	7	0	4	13	0	13	0	1	0	1	0	8	7	1	71	37	0	11	24	0
2	3	0	9	1	0	96	74	0	2	2	0	2	13	0	35	0	0	0	1	0	27	2	0	26	15	0	23	1	0
4	0	0	66	0	0	94	62	0	14	0	0	0	0	0	10	0	0	3	2	0	44	1	0	48	59	0	0	20	0
1	0	0	10	1	0	51	7	1	3	10	0	18	4	0	14	0	0	3	0	0	12	0	0	94	36	0	27	29	0
7	0	0	22	1	1	95	5	0	4	3	0	14	1	0	32	0	0	0	1	0	23	25	0	115	43	1	15	1	0
21	3	0	9	14	0	123	208	0	1	1	0	21	5	0	29	30	2	3	2	0	14	7	0	28	69	0	24	32	0
1	3	0	16	12	1	141	290	0	3	1	0	0	2	0	23	22	1	1	1	0	27	7	0	46	76	0	18	24	0
0	1	0	37	4	1	81	296	0	4	1	0	23	4	0	63	11	1	2	0	0	9	16	0	61	66	0	10	24	0
0	10	0	16	50	0	69	167	1	4	3	0	1	3	0	43	20	0	4	1	0	9	2	0	26	61	0	15	21	0
10	8	0	12	62	0	74	50	0	2	2	0	5	4	0	46	0	0	1	4	0	15	5	0	49	36	0	21	18	0
16	2	0	19	37	0	44	85	0	2	1	0	21	2	0	29	1	0	0	1	0	7	21	0	44	34	0	12	25	0
12	6	0	19	20	0	18	115	0	3	1	0	4	7	0	10	41	1	1	1	0	43	6	1	48	70	0	19	19	0
0	14	0	9	27	1	29	202	0	2	10	1	22	0	0	44	35	0	2	0	0	25	0	1	71	58	0	8	24	0
7	0	0	6	8	1	67	159	0	4	2	0	8	7	0	79	30	1	0	2	0	22	3	1	70	91	0	4	10	0
3	0	0	6	19	0	53	74	0	2	1	1	18	4	0	67	46	0	0	1	0	22	14	0	26	69	0	26	10	0
0	8	0	1	15	0	52	17	0	0	0	1	4	18	0	41	24	2	1	0	0	2	2	0	69	26	0	11	15	0
0	16	0	2	7	1	40	40	0	1	0	0	4	0	0	34	2	1	1	0	0	3	5	0	80	44	0	17	15	0
0	4	0	2	14	0	33	11	0	3	1	1	6	12	0	36	48	1	0	0	0	0	3	0	23	25	0	24	21	0
1	7	0	3	15	0	27	51	0	2	1	0	25	1	0	35	32	0	0	1	0	6	20	0	69	53	0	2	12	0
2	0	0	6	12	0	42	14	0	1	1	0	17	11	0	44	33	1	0	7	0	3	67	0	33	37	0	11	6	0
1	0	0	10	13	0	32	248	0	3	3	0	20	4	0	51	12	0	0	2	0	5	0	0	39	68	0	23	15	0
2	0	0	12	11	0	49	80	0	1	2	1	10	16	0	28	36	1	0	0	0	1	1	2	63	77	0	11	8	0
1	0	0	7	15	0	32	51	0	4	2	1	1	4	0	58	87	0	0	0	0	7	69	1	29	48	0	10	24	0
0	16	0	3	3	0	45	9	0	0	2	1	2	8	0	32	0	0	1	2	0	0	3	1	41	45	0	8	2	0
0	0	0	9	1	0	23	14	0	1	3	1	5	34	0	52	40	1	0	0	0	2	5	1	35	54	1	1	3	0
0	0	0	5	3	0	6	21	0	8	2	0	6	3	0	7	12	0	1	1	0	8	2	0	43	24	0	16	16	0
0	1	0	2	10	0	31	7	0	2	4	0	4	2	0	36	20	0	0	0	0	4	1	1	28	32	1	7	7	0
1	1	0	3	5	0	42	14	0	6	1	0	1	8	0	53	2	0	1	0	0	10	3	0	47	35	0	13	14	0
0	2	0	7	10	0	24	14	0	4	1	1	0	24	0	20	34	0	0	0	0	4	6	0	59	44	0	2	41	0
0	1	0	2	4	0	47	154	1	1	1	0	0	30	0	60	33	0	1	0	0	2	7	0	28	28	0	14	9	0
41	1	0	10	4	3	46	14	0	2	0	1	3	12	0	47	46	0	1	1	0	3	1	0	27	20	0	7	7	0
0	0	0	10	8	1	44	102	0	5	5	0	1	3	0	59	14	0	1	0	0	1	5	1	9	43	1	0	17	0
0	1	0	1	5	0	28	29	0	6	3	0	9	1	0	19	18	0	0	1	0	0	5	1	18	42	1	9	10	0
0	3	0	0	4	1	8	111	1	3	2	0	9	7	0	51	40	0	1	0	0	4	24	0	19	26	0	15	9	0
13	4	0	19	17	1	28	45	1	2	6	0	11	4	0	39	30	0	1	1	0	1	23	0	23	94	0	18	24	0
3	6	0	11	9	3	21	45	0	0	2	0	11	2	0	41	37	3	0	3	0	14	34	1	24	77	0	10	25	0
1	14	0	8	30	2	26	36	0	5	16	0	11	10	0	57	60	0	0	0	0	5	13	1	25	145	1	6	24	0
0	12	0	9	2	2	13	42	1	0	1	0	14	0	0	57	50	1	0	0	0	0	1	0	19	50	1	7	3	0
3	9	0	6	8	2	25	29	0	0	4	1	8	1	0	57	27	1	0	0	0	1	14	0	24	49	1	0	12	0
1	3	0	2	2	1	10	29	0	0	1	0	9	0	0	63	47	0	4	0	0	1	0	1	29	21	0	14	11	0
0	0	0	14	8	2	25	18	0	2	1	1	5	0	0	60	34	3	0	2	0	1	4	1	29	211	0	18	30	0
3	10	0	4	0	4	49	13	0	1	0	0	9	0	0	109	36	0	0	1	0	0	2	0	22	38	0	5	16	0
1	3	0	3	10	0	44	25	1	0	4	0	15	7	0	64	29	3	0	1	0	0	10	0	12	26	0	21	7	0
1	0	0	1	9	1	12	15	0	5	6	0	13	17	0	60	37	1	0	0	0	5	0	1	29	17	0	5	10	0
0	0	0	1	3	1	32	23	2	1	4	2	11	7	0	49	62	0	1	0	0	1	0	0	28	15	0	10	7	0
1	4	0	9	11	1	7	13	1	4	3	0	13	5	0	57	69	0	0	0	0	0	1	0	17	17	0	10	12	0
2	5	0	6	7	1	23	20	0	3	1	1	13	0	0	33	52	0	1	1	0	2	0	0	16	12	1	0	3	0
0	0	0	5	3	0	4	27	0	2	3	1	21	20	0	56	57	3	3	3	0	1	2	0	20	21	0	13	13	0
0	0	0	1	5	2	14	18	0	2	1	0	11	2	0	84	48	0	0	0	0	0	1	0	17	30	0	8	9	0
0	0	0	3	4	1	7	30	0	6	0	0	15	6	0	46	41	1	1	0	0	1	0	0	11	18	0	11	12	0
2	1	0	5	0	0	7	41	0	1	1	0	10	2	0	59	81	1	0	0	0	2	4	0	14	12	0	5	13	0
0	1	0	7	4	1	22	4	0	5	0	0	4	1	0	44	34	0	0	0	0	5	2	0	11	11	0	7	1	0
3	0	0	10	5	0	11	19	0	3	1	0	8	1	0	36	63	3	0	0	0	8	0	0	10	23	0	6	18	0
5	0	0	9	3	0	7	11	0	4	3	1	7	11	0	38	34	0	2	0	0	7	0	0	21	32	0	0	12	0
1	0	0	7	2	1	14	13	2	1	1	1	12	4	0	16	12	2	0	3	0	1	1	0	23	13	0	15	5	0
13	1	0	21	2	0	6	6	3	17	2	0	6	14	0	4	61	1	0	1	0	10	2	0	34	12	1	3	4	0
0	0	0	1	2	0	23	7	3	2	3	2	8	0	0	16	172	0	0	1	0	0	0	0	10	15	0	5	6	0
19	0	1	35	1	1	5	8	2	2	2	1	8	15	0	10	121	2	1	3	0	0	10	0	9	17	0	2	7	0
19	5	2	10	4	0	12	6	5	1	3	0	11	5	0	7	34	1	0	0	0	0	1	0	13	6	0	3	9	0
2	0	0	8	8	1	11	23	8	9	2	1	2	14	0	23	46	5	0	5	0	0	28	0	10	9	0	4	7	0
15	2	0	14	5	2	10	7	4	0	3	1	4	1	0	19	19	4	0	0	0	0	7	0	12	10	0	2	10	0
0	2	0	18	5	0	10	5	4	5	1	0	10	5	0	12	6	2	0	1	1	0	7	2	8	10	0	6	6	1
17	1	0	33	8	1	9	5	3	4	5	0	9	4	0	14	19	2	0	1	0	0	1	1	6	28	0	6	5	0
3	14	0	25	30	0	3	21	5	5	11	0	4	7	0	18	13	3	0	1	0	0	9	0	7	17	0	3	12	0
0	8	0	8	7	0	7	6	4	5	2	2	18	2	0	17	12	1	0	0	0	0	0	0	12	26	0	5	5	0
1	14	0	5	12	0	5	7	5	2	2	1	10	17	0	18	4	3	0	0	0	0	0	0	4	9	0	6	4	0
1	3	0	19	7	0	9	3	7	0	3	0	16	26	0	9	4	3	0	0	0	0	0	0	9	11	0	2	1	0
0	5	0	4	15	2	5	12	4	2	7	0	12	8	0	14	4	0	0	0	0	0	0	0	13	14	0	3	4	0
1	1	0	14	6	0	11	15	2	0	3	0	17	7	0	15	15	3	0	0	0	0	0	0	19	27	0	10	15	0
4	0	0	13	1	0	11	3	2	4	1	0	13	3	0	12	0	3	0	0	0	0	0	0	6	7	0	3	3	0
0	0	0	18	10	0	5	1	4	2	2	0	24	3	0	17	14	0	0	0	0	0	0	0	10	6	0	1	6	0
3	15	0	9	17	0	5	3	2	3	2	0	9	12	0	14	12	1	0	0	0	0	0	0	14	5	0	0	6	0
0	2	0	3	17	0	15	0	3	0	3	1	4	8	0	15	27	4	0	0	0	0	0	0	2	5	0	1	3	0
2	0	0	2	6	0	4	22	2	3	3	1	0	4	0	9	14	2	0	0	0	0	0	0	2	9	0	6	6	0
0	1	0	7	6	1	5	10	2	3	1	0	19	5	0	3	20	3	0	0	0	0	0	0	10	37	0	2	15	0
2	0	0	8	9	0	7	4	0	1	9	0	25	33	0	12	6	2	0	0	0	0	0	2	16	28	1	5	1	1
0	2	0	9	4	0	5	38	3	2	1	0	9	10	0	8	10	0	0	0	0	0	0	0	3	10	0	1	4	0
2	1	1	3	23	0	2	0	3	1	0	0	17	64	0	8	21	1	0	0	0	0	0	0	14	44	1	2	17	0
1	2	0	11	4	0	7	9	0	0	3	0	11	30	0	5	14	0	0	0	0	0	0	0	4	4	0	1	0	0
3	0	1	2	13	0	6	8	3	0	4	1	5	17	0	15	13	2	0	0	0	0	0	0	7	36	0	0	2	0
2	3	0	6	7	0	11	10	2	0	3	1	20	13	0	6	9	1	0	0	0	0	0	1	3	4	0	1	0	0
2	0	0	15	5	0	5	4	4	1	0	0	21	24	0	7	11	2	0	0	0	0	0	0	6	6	2	0	1	0
4	6	1	4	9	0	7	17	2	2	2	0	0	8	0	2	14	2	0	0	0	0	0	0	13	8	0	4	10	0
0	0	0	6	4	0	10	5	2	1	0	0	0	15	0	15	3	2	0	1	0	0	1	0	6	17	0	2	0	0
3	0	0	11	0	0	12	10	5	0	0	0	12	14	0	1	1	0	1	0	0	0	0	0	8	2	2	2	1	0
0	0	0	0	0	0	0	0	0	0	0	0	0	0	0	0	0	0	0	0	0	0	0	0	0	0	0	0	0	0
0	0	0	0	0	0	0	0	0	0	0	0	0	0	0	0	0	0	0	0	0	0	0	0	0	0	0	0	0	0
0	0	0	0	0	0	0	0	0	0	0	0	0	0	0	0	0	0	0	0	0	0	0	0	0	0	0	0	0	0
0	0	0	0	0	0	0	0	0	0	0	0	0	0	0	0	0	0	0	0	0	0	0	0	0	0	0	0	0	0
0	0	0	0	0	0	0	0	0	0	0	0	0	0	0	0	0	0	0	0	0	0	0	0	0	0	0	0	0	0
0	0	0	0	0	0	0	0	0	0	0	0	0	0	0	0	0	0	0	0	0	0	0	0	0	0	0	0	0	0
0	0	0	0	0	0	0	0	0	0	0	0	0	0	0	2	0	0	0	0	0	0	0	0	0	0	0	0	0	0
0	0	0	0	0	0	0	0	0	0	0	0	0	0	0	0	0	0	0	0	0	0	0	0	0	0	0	0	0	0
0	0	0	0	0	0	1	0	0	0	0	0	0	0	0	0	0	0	0	0	0	0	0	0	0	0	0	0	0	0
0	0	0	0	0	0	0	0	0	0	0	0	0	0	0	0	0	0	0	0	0	0	0	0	0	0	0	0	0	0
0	0	0	0	0	0	0	0	0	1	0	0	0	0	0	0	0	0	0	0	0	0	0	0	0	0	0	0	0	0
0	0	0	0	0	0	0	0	0	0	0	0	0	0	0	0	0	0	0	0	0	0	0	0	0	0	0	0	0	0
0	0	0	0	0	0	0	0	0	0	0	0	0	0	0	0	0	0	0	0	0	0	0	0	0	0	0	0	0	0
0	0	0	0	0	0	0	0	0	0	0	0	0	0	0	2	0	0	0	0	0	0	0	0	2	0	0	0	0	0
0	0	0	0	0	0	6	0	0	12	0	0	0	0	0	3	0	0	0	0	0	0	0	0	8	0	0	0	0	0
0	0	0	2	0	0	2	0	0	0	0	0	0	0	0	0	0	0	0	0	0	0	0	0	4	0	0	0	0	0
0	0	0	0	0	0	0	0	0	0	0	0	0	0	0	0	0	0	0	0	0	0	0	0	0	0	0	0	0	0
0	0	0	0	0	0	0	0	0	0	0	0	0	0	0	0	0	0	0	0	0	0	0	0	0	0	0	0	0	0
0	0	0	0	0	0	1	0	0	0	0	0	0	0	0	0	0	0	0	0	0	0	0	0	0	0	0	0	0	0
0	0	0	0	0	0	0	0	0	0	0	0	0	0	0	0	0	0	0	0	0	0	0	0	0	0	0	0	0	0
0	0	0	0	0	0	0	0	0	0	0	0	0	0	0	0	0	0	0	0	0	0	0	0	0	0	0	0	0	0
0	0	0	0	0	0	1	0	0	0	0	0	0	0	0	2	0	0	0	0	0	0	0	0	0	0	0	0	0	0
0	0	0	0	0	0	0	0	0	0	0	0	0	0	0	0	3	0	0	0	0	0	0	0	0	1	0	0	0	0
0	0	0	0	2	0	2	0	0	0	0	0	0	0	0	0	4	0	0	0	0	0	0	0	0	13	0	0	0	0
0	0	0	0	0	0	0	0	0	0	0	0	0	0	0	0	0	0	0	0	0	0	0	0	3	0	0	0	0	0
0	0	0	0	0	0	1	8	0	0	4	0	0	0	0	1	6	0	0	0	0	0	0	0	0	1	0	0	0	0
0	0	0	0	0	0	2	0	0	1	0	0	0	0	0	0	0	0	0	0	0	0	0	0	0	0	0	0	0	0
0	0	0	0	0	0	6	3	0	0	0	0	0	0	0	7	0	0	0	0	0	0	0	0	3	1	0	4	0	0
0	0	0	0	0	0	0	0	0	0	0	0	0	0	0	0	0	0	0	0	0	0	0	0	4	0	0	1	0	0
0	0	0	0	0	0	0	0	0	1	0	0	0	0	0	0	0	0	0	0	0	0	0	0	1	0	0	0	0	0
0	0	0	1	0	0	0	0	0	0	0	0	0	0	0	0	0	0	0	0	0	0	0	0	0	0	0	0	0	0
0	0	0	0	0	0	0	0	0	0	0	0	0	0	0	0	0	0	0	0	0	0	0	0	0	0	0	0	0	0
0	0	0	0	0	0	0	0	0	0	0	0	0	0	0	0	0	0	0	0	0	0	0	0	0	0	0	0	0	0
0	0	0	8	0	0	0	0	0	0	0	0	0	0	0	0	0	0	0	0	0	0	0	0	1	0	0	0	0	0
0	0	0	0	0	0	1	0	0	1	0	0	0	0	0	0	0	0	0	0	0	0	0	0	0	0	0	0	0	0
0	0	0	5	0	0	0	0	0	2	0	0	0	0	0	0	0	0	0	0	0	0	0	0	0	1	0	0	0	0
0	0	0	0	0	0	2	0	0	0	10	0	0	0	0	3	0	0	0	0	0	0	0	0	0	3	0	0	0	0
0	0	0	0	0	0	0	0	0	0	0	0	0	0	0	1	0	0	0	0	0	0	0	0	1	0	0	0	0	0
0	0	0	0	0	0	2	23	0	0	0	0	0	0	0	1	0	1	0	0	0	0	0	0	0	3	0	0	2	0
0	0	0	0	0	0	0	2	0	1	0	0	0	0	0	0	0	0	0	0	0	0	0	0	0	0	0	0	0	0
0	0	0	0	0	0	3	1	0	0	0	0	0	0	0	0	0	0	0	0	0	0	0	0	3	0	0	0	2	0
0	0	0	2	0	0	0	0	0	1	0	0	0	0	0	0	11	0	0	0	0	1	0	0	0	0	0	0	0	0
0	0	0	0	1	0	0	0	0	0	1	0	0	0	0	0	0	0	0	0	0	0	0	0	0	0	0	1	0	0
0	0	0	1	0	0	1	2	0	1	0	0	0	0	0	0	0	0	0	0	0	0	0	0	1	2	0	0	0	0
1	0	0	2	0	0	0	0	0	0	0	0	1	0	0	4	0	0	1	0	0	5	0	0	0	0	0	0	0	0
0	0	0	5	3	0	2	0	0	6	4	0	0	0	0	0	0	0	0	0	0	0	1	0	0	1	0	0	1	0
0	0	0	1	0	0	0	0	0	0	0	0	0	0	0	1	0	0	0	0	0	0	0	0	0	0	0	0	0	0
0	0	0	0	0	0	1	0	0	5	0	0	0	0	0	1	0	0	0	0	0	1	0	0	0	0	0	0	0	0
0	0	0	0	0	0	1	0	0	0	3	0	0	0	0	0	0	0	0	0	0	1	0	0	0	0	0	0	0	0
0	0	0	0	1	0	0	0	0	0	6	0	0	0	0	40	0	0	0	0	0	0	1	0	0	0	0	1	0	0
1	0	0	0	0	0	0	0	0	1	0	0	0	0	0	0	0	0	0	0	0	0	2	0	0	0	0	0	0	0
1	0	0	1	0	0	0	0	0	0	0	0	1	0	0	0	0	0	0	0	0	0	0	0	0	0	0	0	0	0
0	0	0	1	0	0	0	0	0	0	0	0	3	0	0	0	0	0	0	0	0	0	0	0	0	0	0	0	0	0
0	0	0	0	0	0	0	0	0	10	0	0	1	0	0	0	0	0	0	0	0	0	0	0	0	0	0	0	0	0
0	0	0	4	2	0	0	0	0	0	0	0	0	0	0	0	0	0	1	0	0	0	0	0	1	1	0	0	1	0
0	1	0	0	3	0	8	0	0	0	0	0	0	0	0	0	0	0	0	0	0	0	0	0	0	0	0	0	0	0
3	0	0	1	8	0	0	0	0	0	0	0	0	0	0	0	0	0	0	0	0	0	0	0	0	2	0	0	0	0
0	0	0	0	0	0	0	0	0	0	0	0	0	0	0	0	0	0	0	0	0	0	0	0	0	0	0	0	0	0
0	0	0	1	0	0	0	0	0	0	0	0	1	4	0	0	0	0	0	1	0	0	4	0	0	0	0	0	0	0
0	1	0	0	3	0	1	0	0	1	0	0	0	0	0	0	0	0	0	0	0	0	0	0	0	0	0	0	0	0
3	0	0	0	2	0	4	0	0	2	2	0	1	0	0	0	0	0	1	0	0	0	0	0	1	0	0	0	0	0
0	0	0	0	0	0	1	1	0	0	0	0	0	0	0	0	0	0	0	0	0	0	0	0	1	0	0	0	0	0
0	0	0	0	0	0	0	0	0	0	0	0	0	0	0	0	0	0	0	1	0	1	0	0	5	2	0	0	0	0
0	0	0	0	0	0	1	0	0	0	0	0	0	0	0	0	0	0	0	0	0	0	0	0	1	0	0	2	0	0
0	0	0	0	0	0	1	3	0	0	4	0	0	0	0	0	0	0	0	0	0	0	0	0	0	0	0	3	0	0
2	0	0	2	4	0	1	1	0	0	2	0	1	0	0	0	33	0	0	0	0	1	0	0	0	0	0	0	0	0
0	0	1	1	0	0	0	0	0	0	1	0	0	1	0	0	0	0	0	0	0	1	0	0	0	0	0	0	0	0
0	0	0	0	0	0	0	0	0	0	0	0	0	0	0	0	0	0	0	1	0	0	0	0	1	0	0	1	0	0
0	1	0	2	2	0	0	2	0	0	0	0	0	0	0	0	2	0	0	0	0	0	0	0	0	0	0	9	0	0
0	0	0	3	7	0	0	0	0	1	0	0	0	0	0	0	0	0	1	0	0	0	0	0	9	1	0	2	0	0
2	0	0	17	0	0	8	0	0	2	3	0	0	2	0	0	0	0	0	0	0	3	0	0	3	1	0	19	0	0
0	3	0	0	0	0	4	4	0	1	0	0	1	0	0	0	0	0	0	0	0	0	0	0	8	0	0	1	0	0
0	3	0	3	0	0	5	1	0	0	0	0	0	0	0	0	0	0	0	0	0	0	0	0	15	2	0	8	1	0
0	0	0	0	0	0	3	1	0	2	2	0	1	1	0	0	0	0	0	0	0	0	0	0	0	0	0	1	4	0
0	0	0	0	0	0	1	1	0	1	1	0	0	0	0	0	0	0	0	0	0	0	1	0	0	0	0	4	0	0
0	1	0	4	0	0	1	1	0	0	0	0	0	0	0	0	0	0	0	0	0	0	3	0	4	1	0	5	3	0
0	0	0	5	0	0	2	0	0	0	0	0	1	0	0	0	0	0	0	1	0	2	2	0	3	0	0	3	1	0
0	0	0	1	0	0	3	8	0	10	3	0	0	0	0	2	0	0	0	0	0	0	0	0	5	1	0	2	5	0
0	0	0	2	0	0	1	7	0	0	2	0	0	0	0	2	0	1	0	0	0	0	2	0	5	1	0	1	1	0
0	0	0	0	0	0	6	2	0	0	0	0	0	0	0	2	0	0	0	0	0	0	0	0	9	0	0	3	0	0
0	1	0	2	0	0	1	0	0	0	2	0	2	1	0	7	0	0	0	0	0	3	0	0	4	6	0	5	7	0
0	1	0	0	15	0	0	11	0	7	1	0	0	1	0	6	0	0	0	0	0	0	0	0	8	4	0	2	2	0
0	0	0	6	6	0	10	3	0	0	0	0	0	0	0	2	0	0	0	0	0	0	3	0	8	5	0	5	3	0
0	0	0	0	0	0	0	0	0	0	0	0	0	0	0	2	0	0	0	0	0	0	0	0	0	0	0	0	0	0
0	0	0	0	0	0	0	0	0	0	0	0	0	0	0	0	0	0	0	0	0	0	0	0	0	0	0	0	0	0
0	0	0	0	0	0	1	0	0	0	0	0	0	0	0	0	0	0	0	0	0	0	0	0	0	0	0	0	0	0
0	0	0	0	0	0	0	0	0	0	0	0	0	0	0	0	0	0	0	0	0	0	0	0	0	0	0	0	0	0
0	0	0	0	0	0	0	0	0	1	0	0	0	0	0	0	0	0	0	0	0	0	0	0	0	0	0	0	0	0
0	0	0	0	0	0	0	0	0	0	0	0	0	0	0	0	0	0	0	0	0	0	0	0	0	0	0	0	0	0
0	0	0	0	0	0	0	0	0	0	0	0	0	0	0	0	0	0	0	0	0	0	0	0	0	0	0	0	0	0
0	0	0	0	0	0	0	0	0	0	0	0	0	0	0	2	0	0	0	0	0	0	0	0	2	0	0	0	0	0
0	0	0	0	0	0	6	0	0	12	0	0	0	0	0	3	0	0	0	0	0	0	0	0	8	0	0	0	0	0
0	0	0	2	0	0	2	0	0	0	0	0	0	0	0	0	0	0	0	0	0	0	0	0	4	0	0	0	0	0
0	0	0	0	0	0	0	0	0	0	0	0	0	0	0	0	0	0	0	0	0	0	0	0	0	0	0	0	0	0
0	0	0	0	0	0	0	0	0	0	0	0	0	0	0	0	0	0	0	0	0	0	0	0	0	0	0	0	0	0
0	0	0	0	0	0	1	0	0	0	0	0	0	0	0	0	0	0	0	0	0	0	0	0	0	0	0	0	0	0
0	0	0	0	0	0	0	0	0	0	0	0	0	0	0	0	0	0	0	0	0	0	0	0	0	0	0	0	0	0
0	0	0	0	0	0	0	0	0	0	0	0	0	0	0	0	0	0	0	0	0	0	0	0	0	0	0	0	0	0
0	0	0	0	0	0	1	0	0	0	0	0	0	0	0	2	0	0	0	0	0	0	0	0	0	0	0	0	0	0
0	0	0	0	0	0	0	0	0	0	0	0	0	0	0	0	3	0	0	0	0	0	0	0	0	1	0	0	0	0
0	0	0	0	2	0	2	0	0	0	0	0	0	0	0	0	4	0	0	0	0	0	0	0	0	13	0	0	0	0
0	0	0	0	0	0	0	0	0	0	0	0	0	0	0	0	0	0	0	0	0	0	0	0	3	0	0	0	0	0
0	0	0	0	0	0	1	8	0	0	4	0	0	0	0	1	6	0	0	0	0	0	0	0	0	1	0	0	0	0
0	0	0	0	0	0	2	0	0	1	0	0	0	0	0	0	0	0	0	0	0	0	0	0	0	0	0	0	0	0
0	0	0	0	0	0	6	3	0	0	0	0	0	0	0	7	0	0	0	0	0	0	0	0	3	1	0	4	0	0
0	0	0	0	0	0	0	0	0	0	0	0	0	0	0	0	0	0	0	0	0	0	0	0	4	0	0	1	0	0
0	0	0	0	0	0	0	0	0	1	0	0	0	0	0	0	0	0	0	0	0	0	0	0	1	0	0	0	0	0
0	0	0	1	0	0	0	0	0	0	0	0	0	0	0	0	0	0	0	0	0	0	0	0	0	0	0	0	0	0
0	0	0	0	0	0	0	0	0	0	0	0	0	0	0	0	0	0	0	0	0	0	0	0	0	0	0	0	0	0
0	0	0	0	0	0	0	0	0	0	0	0	0	0	0	0	0	0	0	0	0	0	0	0	0	0	0	0	0	0
0	0	0	8	0	0	0	0	0	0	0	0	0	0	0	0	0	0	0	0	0	0	0	0	1	0	0	0	0	0
0	0	0	0	0	0	1	0	0	1	0	0	0	0	0	0	0	0	0	0	0	0	0	0	0	0	0	0	0	0
0	0	0	5	0	0	0	0	0	2	0	0	0	0	0	0	0	0	0	0	0	0	0	0	0	1	0	0	0	0
0	0	0	0	0	0	2	0	0	0	10	0	0	0	0	3	0	0	0	0	0	0	0	0	0	3	0	0	0	0
0	0	0	0	0	0	0	0	0	0	0	0	0	0	0	1	0	0	0	0	0	0	0	0	1	0	0	0	0	0
0	0	0	0	0	0	2	23	0	0	0	0	0	0	0	1	0	1	0	0	0	0	0	0	0	3	0	0	2	0
0	0	0	0	0	0	0	2	0	1	0	0	0	0	0	0	0	0	0	0	0	0	0	0	0	0	0	0	0	0
0	0	0	0	0	0	3	1	0	0	0	0	0	0	0	0	0	0	0	0	0	0	0	0	3	0	0	0	2	0
0	0	0	2	0	0	0	0	0	1	0	0	0	0	0	0	11	0	0	0	0	1	0	0	0	0	0	0	0	0
0	0	0	0	1	0	0	0	0	0	1	0	0	0	0	0	0	0	0	0	0	0	0	0	0	0	0	1	0	0
0	0	0	1	0	0	1	2	0	1	0	0	0	0	0	0	0	0	0	0	0	0	0	0	1	2	0	0	0	0
1	0	0	2	0	0	0	0	0	0	0	0	1	0	0	4	0	0	1	0	0	5	0	0	0	0	0	0	0	0
0	0	0	5	3	0	2	0	0	6	4	0	0	0	0	0	0	0	0	0	0	0	1	0	0	1	0	0	1	0
0	0	0	1	0	0	0	0	0	0	0	0	0	0	0	1	0	0	0	0	0	0	0	0	0	0	0	0	0	0
0	0	0	0	0	0	1	0	0	5	0	0	0	0	0	1	0	0	0	0	0	1	0	0	0	0	0	0	0	0
0	0	0	0	0	0	1	0	0	0	3	0	0	0	0	0	0	0	0	0	0	1	0	0	0	0	0	0	0	0
0	0	0	0	1	0	0	0	0	0	6	0	0	0	0	40	0	0	0	0	0	0	1	0	0	0	0	1	0	0
1	0	0	0	0	0	0	0	0	1	0	0	0	0	0	0	0	0	0	0	0	0	2	0	0	0	0	0	0	0
1	0	0	1	0	0	0	0	0	0	0	0	1	0	0	0	0	0	0	0	0	0	0	0	0	0	0	0	0	0
0	0	0	1	0	0	0	0	0	0	0	0	3	0	0	0	0	0	0	0	0	0	0	0	0	0	0	0	0	0
0	0	0	0	0	0	0	0	0	10	0	0	1	0	0	0	0	0	0	0	0	0	0	0	0	0	0	0	0	0
0	0	0	4	2	0	0	0	0	0	0	0	0	0	0	0	0	0	1	0	0	0	0	0	1	1	0	0	1	0
0	1	0	0	3	0	8	0	0	0	0	0	0	0	0	0	0	0	0	0	0	0	0	0	0	0	0	0	0	0
3	0	0	1	8	0	0	0	0	0	0	0	0	0	0	0	0	0	0	0	0	0	0	0	0	2	0	0	0	0
0	0	0	0	0	0	0	0	0	0	0	0	0	0	0	0	0	0	0	0	0	0	0	0	0	0	0	0	0	0
0	0	0	1	0	0	0	0	0	0	0	0	1	4	0	0	0	0	0	1	0	0	4	0	0	0	0	0	0	0
0	1	0	0	3	0	1	0	0	1	0	0	0	0	0	0	0	0	0	0	0	0	0	0	0	0	0	0	0	0
3	0	0	0	2	0	4	0	0	2	2	0	1	0	0	0	0	0	1	0	0	0	0	0	1	0	0	0	0	0
0	0	0	0	0	0	1	1	0	0	0	0	0	0	0	0	0	0	0	0	0	0	0	0	1	0	0	0	0	0
0	0	0	0	0	0	0	0	0	0	0	0	0	0	0	0	0	0	0	1	0	1	0	0	5	2	0	0	0	0
0	0	0	0	0	0	1	0	0	0	0	0	0	0	0	0	0	0	0	0	0	0	0	0	1	0	0	2	0	0
0	0	0	0	0	0	1	3	0	0	4	0	0	0	0	0	0	0	0	0	0	0	0	0	0	0	0	3	0	0
2	0	0	2	4	0	1	1	0	0	2	0	1	0	0	0	33	0	0	0	0	1	0	0	0	0	0	0	0	0
0	0	1	1	0	0	0	0	0	0	1	0	0	1	0	0	0	0	0	0	0	1	0	0	0	0	0	0	0	0
0	0	0	0	0	0	0	0	0	0	0	0	0	0	0	0	0	0	0	1	0	0	0	0	1	0	0	1	0	0
0	1	0	2	2	0	0	2	0	0	0	0	0	0	0	0	2	0	0	0	0	0	0	0	0	0	0	9	0	0
0	0	0	3	7	0	0	0	0	1	0	0	0	0	0	0	0	0	1	0	0	0	0	0	9	1	0	2	0	0
2	0	0	17	0	0	8	0	0	2	3	0	0	2	0	0	0	0	0	0	0	3	0	0	3	1	0	19	0	0
0	3	0	0	0	0	4	4	0	1	0	0	1	0	0	0	0	0	0	0	0	0	0	0	8	0	0	1	0	0
0	3	0	3	0	0	5	1	0	0	0	0	0	0	0	0	0	0	0	0	0	0	0	0	15	2	0	8	1	0
0	0	0	0	0	0	3	1	0	2	2	0	1	1	0	0	0	0	0	0	0	0	0	0	0	0	0	1	4	0
0	0	0	0	0	0	1	1	0	1	1	0	0	0	0	0	0	0	0	0	0	0	1	0	0	0	0	4	0	0
0	1	0	4	0	0	1	1	0	0	0	0	0	0	0	0	0	0	0	0	0	0	3	0	4	1	0	5	3	0
0	0	0	5	0	0	2	0	0	0	0	0	1	0	0	0	0	0	0	1	0	2	2	0	3	0	0	3	1	0
0	0	0	1	0	0	3	8	0	10	3	0	0	0	0	2	0	0	0	0	0	0	0	0	5	1	0	2	5	0
0	0	0	2	0	0	1	7	0	0	2	0	0	0	0	2	0	1	0	0	0	0	2	0	5	1	0	1	1	0
0	0	0	0	0	0	6	2	0	0	0	0	0	0	0	2	0	0	0	0	0	0	0	0	9	0	0	3	0	0
0	1	0	2	0	0	1	0	0	0	2	0	2	1	0	7	0	0	0	0	0	3	0	0	4	6	0	5	7	0
0	1	0	0	15	0	0	11	0	7	1	0	0	1	0	6	0	0	0	0	0	0	0	0	8	4	0	2	2	0
0	0	0	6	6	0	10	3	0	0	0	0	0	0	0	2	0	0	0	0	0	0	3	0	8	5	0	5	3	0
0	0	0	0	10	0	2	3	0	2	1	0	2	0	0	4	0	0	0	0	0	0	0	0	16	0	0	2	5	0
0	0	0	0	1	0	3	0	0	0	0	0	0	0	0	7	0	0	0	0	0	0	0	0	8	2	0	4	4	0
0	0	0	0	2	0	11	2	0	0	6	0	1	0	0	3	1	0	0	0	0	1	0	0	10	4	0	5	2	0
0	0	0	12	3	0	10	0	0	0	1	0	0	0	0	15	0	0	0	0	0	0	0	0	9	0	0	0	0	0
0	0	0	7	1	0	19	5	0	1	1	1	1	1	0	13	2	1	1	0	0	2	0	0	10	3	0	3	7	0
1	0	0	16	0	0	4	3	0	2	0	0	0	0	0	27	1	0	0	0	0	0	0	0	18	3	0	1	8	0
0	0	0	13	3	1	4	3	0	2	0	0	1	1	0	13	4	0	2	0	0	0	0	0	9	26	0	5	12	0
0	0	0	0	2	1	13	1	0	2	5	0	0	0	0	5	3	0	0	1	0	0	3	0	9	4	0	0	0	0
0	0	0	1	0	1	18	2	0	6	1	0	0	0	0	20	9	0	0	0	0	6	0	0	17	21	0	2	11	0
1	0	0	6	0	0	50	5	0	2	4	0	0	1	0	20	3	0	1	0	0	0	0	0	19	15	0	6	4	0
2	0	0	14	0	0	28	1	0	8	3	0	1	1	0	1	8	1	2	0	0	0	0	0	21	11	0	8	2	0
0	0	0	0	0	0	39	2	0	2	3	0	1	2	0	6	5	0	0	0	0	0	0	0	16	6	0	0	4	0
1	0	0	2	1	0	9	3	0	0	1	0	0	1	0	15	1	0	0	0	0	0	0	0	53	9	0	5	1	0
2	1	0	6	24	0	53	13	0	20	0	0	1	0	0	9	0	0	1	0	0	3	1	0	24	3	0	12	1	0
2	0	0	2	13	0	55	0	0	5	5	0	2	1	0	14	49	2	2	0	0	0	1	0	24	28	0	12	5	0
0	0	0	3	19	1	77	7	0	17	1	0	2	0	0	6	0	0	0	0	0	1	0	1	39	2	1	7	1	0
0	0	0	3	5	1	58	10	0	7	5	0	3	0	0	3	2	0	2	0	0	3	0	0	51	12	0	13	0	0
4	2	0	3	9	1	99	23	0	10	9	0	7	1	0	10	0	0	0	0	0	10	0	0	35	19	0	8	5	0
1	1	0	3	5	0	28	11	0	4	4	1	9	0	0	14	62	0	3	0	0	4	0	0	58	24	0	10	5	0
0	1	0	1	2	0	110	46	0	8	0	0	9	0	0	19	3	0	1	0	0	3	0	0	69	21	0	2	3	0
0	1	0	3	7	1	59	45	0	2	10	0	0	1	0	11	10	1	0	1	0	3	7	0	25	18	0	20	2	0
1	0	0	0	2	0	79	31	1	0	3	2	15	0	0	17	6	1	0	4	0	0	0	0	70	33	0	3	11	0
1	2	0	3	0	0	91	41	2	22	0	0	6	0	0	2	0	0	2	1	0	7	1	0	48	30	0	13	12	0
5	2	0	3	6	0	45	28	2	7	3	0	1	0	0	9	9	1	2	2	0	28	6	0	16	42	0	1	8	0
8	1	0	5	0	0	46	39	0	19	1	0	3	0	0	28	2	0	1	2	0	15	8	0	86	38	0	28	4	0
0	0	0	3	6	0	58	2	0	4	8	0	5	8	0	16	18	0	3	1	0	7	0	0	46	30	0	20	12	0
2	4	0	7	0	2	234	13	0	8	5	0	3	6	0	20	16	0	2	4	0	2	4	0	90	0	0	18	0	0
0	1	0	4	3	1	120	19	0	3	3	1	0	9	0	8	0	1	1	0	0	0	7	1	39	0	0	8	0	0
5	0	0	3	1	0	166	121	0	3	33	0	17	8	0	5	23	1	0	0	0	2	10	0	88	75	0	26	12	0
8	0	0	2	0	1	144	35	0	6	9	0	5	11	0	8	3	1	0	0	0	1	4	0	64	1	0	4	0	0
0	0	0	0	0	0	78	106	0	9	11	0	10	3	0	9	28	1	0	1	0	0	3	0	45	122	0	22	19	0
7	0	0	45	0	2	81	62	1	6	8	0	1	4	0	11	6	0	6	1	0	17	4	0	61	50	0	28	13	0
2	2	0	10	1	3	60	60	1	0	1	0	1	0	0	13	11	1	2	0	0	19	2	1	90	46	0	32	12	0
7	4	0	15	0	0	125	29	0	2	11	0	5	3	0	17	0	0	2	0	0	19	0	0	39	10	1	23	0	0
4	0	0	61	0	1	177	41	0	5	0	0	2	1	0	17	26	0	2	0	0	30	5	1	133	3	0	29	13	0
2	0	0	9	3	1	65	30	0	2	8	1	3	11	0	6	10	0	4	4	0	8	9	0	102	51	0	19	3	0
0	0	0	21	0	1	73	30	0	7	12	1	4	0	0	14	1	1	2	2	0	8	4	0	66	44	0	39	1	0
4	2	0	10	5	0	89	192	0	2	7	0	4	13	0	13	0	1	0	1	0	8	7	1	71	37	0	11	24	0
2	3	0	9	1	0	96	74	0	2	2	0	2	13	0	35	0	0	0	1	0	27	2	0	26	15	0	23	1	0
4	0	0	66	0	0	94	62	0	14	0	0	0	0	0	10	0	0	3	2	0	44	1	0	48	59	0	0	20	0
1	0	0	10	1	0	51	7	1	3	10	0	18	4	0	14	0	0	3	0	0	12	0	0	94	36	0	27	29	0
7	0	0	22	1	1	95	5	0	4	3	0	14	1	0	32	0	0	0	1	0	23	25	0	115	43	1	15	1	0
21	3	0	9	14	0	123	208	0	1	1	0	21	5	0	29	30	2	3	2	0	14	7	0	28	69	0	24	32	0
1	3	0	16	12	1	141	290	0	3	1	0	0	2	0	23	22	1	1	1	0	27	7	0	46	76	0	18	24	0
0	1	0	37	4	1	81	296	0	4	1	0	23	4	0	63	11	1	2	0	0	9	16	0	61	66	0	10	24	0
0	10	0	16	50	0	69	167	1	4	3	0	1	3	0	43	20	0	4	1	0	9	2	0	26	61	0	15	21	0
10	8	0	12	62	0	74	50	0	2	2	0	5	4	0	46	0	0	1	4	0	15	5	0	49	36	0	21	18	0
16	2	0	19	37	0	44	85	0	2	1	0	21	2	0	29	1	0	0	1	0	7	21	0	44	34	0	12	25	0
12	6	0	19	20	0	18	115	0	3	1	0	4	7	0	10	41	1	1	1	0	43	6	1	48	70	0	19	19	0
0	14	0	9	27	1	29	202	0	2	10	1	22	0	0	44	35	0	2	0	0	25	0	1	71	58	0	8	24	0
7	0	0	6	8	1	67	159	0	4	2	0	8	7	0	79	30	1	0	2	0	22	3	1	70	91	0	4	10	0
3	0	0	6	19	0	53	74	0	2	1	1	18	4	0	67	46	0	0	1	0	22	14	0	26	69	0	26	10	0
0	8	0	1	15	0	52	17	0	0	0	1	4	18	0	41	24	2	1	0	0	2	2	0	69	26	0	11	15	0
0	16	0	2	7	1	40	40	0	1	0	0	4	0	0	34	2	1	1	0	0	3	5	0	80	44	0	17	15	0
0	4	0	2	14	0	33	11	0	3	1	1	6	12	0	36	48	1	0	0	0	0	3	0	23	25	0	24	21	0
1	7	0	3	15	0	27	51	0	2	1	0	25	1	0	35	32	0	0	1	0	6	20	0	69	53	0	2	12	0
2	0	0	6	12	0	42	14	0	1	1	0	17	11	0	44	33	1	0	7	0	3	67	0	33	37	0	11	6	0
1	0	0	10	13	0	32	248	0	3	3	0	20	4	0	51	12	0	0	2	0	5	0	0	39	68	0	23	15	0
2	0	0	12	11	0	49	80	0	1	2	1	10	16	0	28	36	1	0	0	0	1	1	2	63	77	0	11	8	0

## Sheet: Zone E & F
Zone E															Zone F
cases	recovery	deaths	cases	recovery	deaths	cases	recovery	deaths	cases	recovery	deaths	cases	recovery	deaths	cases	recovery	deaths	cases	recovery	deaths	cases	recovery	deaths	cases	recovery	deaths	cases	recovery	deaths
0	0	0	0	10	0	2	0	0	2	1	0	2	0	0	4	0	0	0	0	0	0	0	0	16	0	0	2	5	0
0	0	0	0	1	0	0	1	0	0	0	0	0	0	0	7	0	0	0	0	0	0	0	0	8	2	0	4	4	0
0	0	0	0	2	0	0	0	0	0	6	0	1	0	0	3	1	0	0	0	0	1	0	0	10	4	0	5	2	0
0	0	0	12	3	0	1	0	0	0	1	0	0	0	0	15	0	0	0	0	0	0	0	0	9	0	0	0	0	0
0	0	0	7	1	0	2	0	0	1	1	1	1	1	0	13	2	1	1	0	0	2	0	0	10	3	0	3	7	0
1	0	0	16	0	0	0	0	0	2	0	0	0	0	0	27	1	0	0	0	0	0	0	0	18	3	0	1	8	0
0	0	0	13	3	1	0	0	0	2	0	0	1	1	0	13	4	0	2	0	0	0	0	0	9	26	0	5	12	0
0	0	0	0	2	1	1	0	0	2	5	0	0	0	0	5	3	0	0	1	0	0	3	0	9	4	0	0	0	0
0	0	0	1	0	1	2	0	0	6	1	0	0	0	0	20	9	0	0	0	0	6	0	0	17	21	0	2	11	0
1	0	0	6	0	0	0	0	0	2	4	0	0	1	0	20	3	0	1	0	0	0	0	0	19	15	0	6	4	0
2	0	0	14	0	0	2	0	0	8	3	0	1	1	0	1	8	1	2	0	0	0	0	0	21	11	0	8	2	0
0	0	0	0	0	0	0	0	0	2	3	0	1	2	0	6	5	0	0	0	0	0	0	0	16	6	0	0	4	0
1	0	0	2	1	0	3	0	0	0	1	0	0	1	0	15	1	0	0	0	0	0	0	0	53	9	0	5	1	0
2	1	0	6	24	0	1	0	0	20	0	0	1	0	0	9	0	0	1	0	0	3	1	0	24	3	0	12	1	0
2	0	0	2	13	0	0	1	0	5	5	0	2	1	0	0	4	1	2	0	0	0	1	0	24	28	0	12	5	0
0	0	0	3	19	1	0	4	0	17	1	0	2	0	0	0	3	1	0	0	0	1	0	1	39	2	1	7	1	0
0	0	0	3	5	1	2	1	0	7	5	0	3	0	0	1	0	0	2	0	0	3	0	0	51	12	0	13	0	0
4	2	0	3	9	1	2	2	0	10	9	0	7	1	0	2	2	0	0	0	0	10	0	0	35	19	0	8	5	0
1	1	0	3	5	0	1	2	0	4	4	1	9	0	0	1	0	0	3	0	0	4	0	0	58	24	0	10	5	0
0	1	0	1	2	0	3	1	0	8	0	0	9	0	0	0	0	0	1	0	0	3	0	0	69	21	0	2	3	0
0	1	0	3	7	1	2	4	0	2	10	0	0	1	0	0	0	0	0	1	0	3	7	0	25	18	0	20	2	0
1	0	0	0	2	0	1	0	0	0	3	2	15	0	0	0	0	0	0	4	0	0	0	0	70	33	0	3	11	0
1	2	0	3	0	0	0	0	0	22	0	0	6	0	0	0	0	0	2	1	0	7	1	0	48	30	0	13	12	0
5	2	0	3	6	0	0	0	0	7	3	0	1	0	0	0	0	0	2	2	0	28	6	0	16	42	0	1	8	0
8	1	0	5	0	0	0	1	0	19	1	0	3	0	0	0	0	0	1	2	0	15	8	0	86	38	0	28	4	0
0	0	0	3	6	0	6	1	0	4	8	0	5	8	0	0	0	0	3	1	0	7	0	0	46	30	0	20	12	0
2	4	0	7	0	2	2	0	0	8	5	0	3	6	0	0	0	0	2	4	0	2	4	0	90	0	0	18	0	0
0	1	0	4	3	1	2	0	0	3	3	1	0	9	0	0	0	0	1	0	0	0	7	1	39	0	0	8	0	0
5	0	0	3	1	0	2	0	0	3	33	0	17	8	0	0	0	0	0	0	0	2	10	0	88	75	0	26	12	0
8	0	0	2	0	1	4	4	0	6	9	0	5	11	0	0	0	0	0	0	0	1	4	0	64	1	0	4	0	0
0	0	0	0	0	0	2	2	0	9	11	0	10	3	0	1	0	0	0	1	0	0	3	0	45	122	0	22	19	0
7	0	0	45	0	2	0	1	0	6	8	0	1	4	0	0	0	0	6	1	0	17	4	0	61	50	0	28	13	0
2	2	0	10	1	3	0	1	0	0	1	0	1	0	0	0	0	0	2	0	0	19	2	1	90	46	0	32	12	0
7	4	0	15	0	0	3	2	0	2	11	0	5	3	0	0	0	0	2	0	0	19	0	0	39	10	1	23	0	0
4	0	0	61	0	1	3	0	0	5	0	0	2	1	0	12	0	0	2	0	0	30	5	1	133	3	0	29	13	0
2	0	0	9	3	1	0	1	0	2	8	1	3	11	0	0	0	0	4	4	0	8	9	0	102	51	0	19	3	0
0	0	0	21	0	1	3	2	0	7	12	1	4	0	0	0	0	0	2	2	0	8	4	0	66	44	0	39	1	0
4	2	0	10	5	0	1	1	0	2	7	0	4	13	0	0	0	0	0	1	0	8	7	1	71	37	0	11	24	0
2	3	0	9	1	0	2	0	0	2	2	0	2	13	0	0	0	0	0	1	0	27	2	0	26	15	0	23	1	0
4	0	0	66	0	0	4	1	0	14	0	0	0	0	0	0	0	0	3	2	0	44	1	0	48	59	0	0	20	0
1	0	0	10	1	0	1	4	0	3	10	0	18	4	0	0	0	0	3	0	0	12	0	0	94	36	0	27	29	0
7	0	0	22	1	1	0	1	0	4	3	0	14	1	0	0	0	0	0	1	0	23	25	0	115	43	1	15	1	0
21	3	0	9	14	0	1	1	0	1	1	0	21	5	0	0	0	0	3	2	0	14	7	0	28	69	0	24	32	0
1	3	0	16	12	1	2	0	0	3	1	0	0	2	0	0	0	0	1	1	0	27	7	0	46	76	0	18	24	0
0	1	0	37	4	1	0	2	0	4	1	0	23	4	0	0	0	0	2	0	0	9	16	0	61	66	0	10	24	0
0	10	0	16	50	0	0	1	0	4	3	0	1	3	0	0	4	0	4	1	0	9	2	0	26	61	0	15	21	0
10	8	0	12	62	0	1	0	0	2	2	0	5	4	0	1	0	0	1	4	0	15	5	0	49	36	0	21	18	0
16	2	0	19	37	0	1	0	0	2	1	0	21	2	0	0	0	0	0	1	0	7	21	0	44	34	0	12	25	0
12	6	0	19	20	0	0	0	0	3	1	0	4	7	0	0	0	0	1	1	0	43	6	1	48	70	0	19	19	0
0	14	0	9	27	1	0	1	0	2	10	1	22	0	0	1	0	0	2	0	0	25	0	1	71	58	0	8	24	0
7	0	0	6	8	1	0	7	0	4	2	0	8	7	0	0	0	0	0	2	0	22	3	1	70	91	0	4	10	0
3	0	0	6	19	0	0	2	0	2	1	1	18	4	0	0	0	0	0	1	0	22	14	0	26	69	0	26	10	0
0	8	0	1	15	0	0	0	0	0	0	1	4	18	0	0	0	0	1	0	0	2	2	0	69	26	0	11	15	0
0	16	0	2	7	1	0	0	0	1	0	0	4	0	0	0	0	0	1	0	0	3	5	0	80	44	0	17	15	0
0	4	0	2	14	0	1	2	0	3	1	1	6	12	0	1	0	0	0	0	0	0	3	0	23	25	0	24	21	0
1	7	0	3	15	0	0	1	0	2	1	0	25	1	0	2	0	0	0	1	0	6	20	0	69	53	0	2	12	0
2	0	0	6	12	0	6	1	0	1	1	0	17	11	0	0	10	0	0	7	0	3	67	0	33	37	0	11	6	0
1	0	0	10	13	0	2	0	0	3	3	0	20	4	0	0	0	0	0	2	0	5	0	0	39	68	0	23	15	0
2	0	0	12	11	0	2	0	0	1	2	1	10	16	0	0	0	0	0	0	0	1	1	2	63	77	0	11	8	0
1	0	0	7	15	0	2	0	0	4	2	1	1	4	0	1	0	0	0	0	0	7	69	1	29	48	0	10	24	0
0	16	0	3	3	0	4	4	0	0	2	1	2	8	0	0	0	0	1	2	0	0	3	1	41	45	0	8	2	0
0	0	0	9	1	0	2	2	0	1	3	1	5	34	0	1	0	0	0	0	0	2	5	1	35	54	1	1	3	0
0	0	0	5	3	0	0	1	0	8	2	0	6	3	0	0	1	0	1	1	0	8	2	0	43	24	0	16	16	0
0	1	0	2	10	0	0	1	0	2	4	0	4	2	0	1	0	0	0	0	0	4	1	1	28	32	1	7	7	0
1	1	0	3	5	0	3	2	0	6	1	0	1	8	0	0	0	0	1	0	0	10	3	0	47	35	0	13	14	0
0	2	0	7	10	0	3	0	0	4	1	1	0	24	0	6	4	0	0	0	0	4	6	0	59	44	0	2	41	0
0	1	0	2	4	0	0	1	0	1	1	0	0	30	0	0	0	0	1	0	0	2	7	0	28	28	0	14	9	0
41	1	0	10	4	3	3	2	0	2	0	1	3	12	0	5	0	0	1	1	0	3	1	0	27	20	0	7	7	0
0	0	0	10	8	1	1	1	0	5	5	0	1	3	0	0	3	0	1	0	0	1	5	1	9	43	1	0	17	0
0	1	0	1	5	0	2	0	0	6	3	0	9	1	0	0	6	0	0	1	0	0	5	1	18	42	1	9	10	0
0	3	0	0	4	1	4	1	0	3	2	0	9	7	0	1	0	0	1	0	0	4	24	0	19	26	0	15	9	0
13	4	0	19	17	1	1	4	0	2	6	0	11	4	0	0	0	0	1	1	0	1	23	0	23	94	0	18	24	0
3	6	0	11	9	3	0	1	0	0	2	0	11	2	0	0	0	0	0	3	0	14	34	1	24	77	0	10	25	0
1	14	0	8	30	2	1	1	0	5	16	0	11	10	0	10	0	0	0	0	0	5	13	1	25	145	1	6	24	0
0	12	0	9	2	2	2	0	0	0	1	0	14	0	0	0	0	0	0	0	0	0	1	0	19	50	1	7	3	0
3	9	0	6	8	2	0	2	0	0	4	1	8	1	0	0	0	0	0	0	0	1	14	0	24	49	1	0	12	0
1	3	0	2	2	1	0	1	0	0	1	0	9	0	0	0	0	0	4	0	0	1	0	1	29	21	0	14	11	0
0	0	0	14	8	2	1	0	0	2	1	1	5	0	0	0	0	0	0	2	0	1	4	1	29	211	0	18	30	0
3	10	0	4	0	4	1	0	0	1	0	0	9	0	0	0	0	0	0	1	0	0	2	0	22	38	0	5	16	0
1	3	0	3	10	0	0	0	0	0	4	0	15	7	0	1	0	0	0	1	0	0	10	0	12	26	0	21	7	0
1	0	0	1	9	1	0	1	0	5	6	0	13	17	0	2	2	0	0	0	0	5	0	1	29	17	0	5	10	0
0	0	0	1	3	1	0	7	0	1	4	2	11	7	0	0	0	0	1	0	0	1	0	0	28	15	0	10	7	0
1	4	0	9	11	1	0	2	0	4	3	0	13	5	0	0	0	0	0	0	0	0	1	0	17	17	0	10	12	0
2	5	0	6	7	1	0	0	0	3	1	1	13	0	0	0	0	0	1	1	0	2	0	0	16	12	1	0	3	0
0	0	0	5	3	0	0	0	0	2	3	1	21	20	0	0	4	0	3	3	0	1	2	0	20	21	0	13	13	0
0	0	0	1	5	2	1	2	0	2	1	0	11	2	0	0	2	0	0	0	0	0	1	0	17	30	0	8	9	0
0	0	0	3	4	1	0	0	0	6	0	0	15	6	0	0	1	0	1	0	0	1	0	0	11	18	0	11	12	0
2	1	0	5	0	0	1	1	0	1	1	0	10	2	0	0	0	0	0	0	0	2	4	0	14	12	0	5	13	0
0	1	0	7	4	1	0	0	0	5	0	0	4	1	0	0	0	0	0	0	0	5	2	0	11	11	0	7	1	0
3	0	0	10	5	0	1	0	0	3	1	0	8	1	0	1	0	0	0	0	0	8	0	0	10	23	0	6	18	0
5	0	0	9	3	0	0	0	0	4	3	1	7	11	0	2	3	0	2	0	0	7	0	0	21	32	0	0	12	0
1	0	0	7	2	1	1	0	0	1	1	1	12	4	0	1	0	0	0	3	0	1	1	0	23	13	0	15	5	0
13	1	0	21	2	0	1	1	0	17	2	0	6	14	0	0	0	0	0	1	0	10	2	0	34	12	1	3	4	0
0	0	0	1	2	0	1	0	0	2	3	2	8	0	0	2	2	0	0	1	0	0	0	0	10	15	0	5	6	0
19	0	1	35	1	1	0	1	0	2	2	1	8	15	0	1	1	0	1	3	0	0	10	0	9	17	0	2	7	0
19	5	2	10	4	0	1	0	0	1	3	0	11	5	0	0	0	0	0	0	0	0	1	0	13	6	0	3	9	0
2	0	0	8	8	1	1	1	0	9	2	1	2	14	0	0	0	0	0	5	0	0	28	0	10	9	0	4	7	0
15	2	0	14	5	2	0	3	0	0	3	1	4	1	0	10	3	0	0	0	0	0	7	0	12	10	0	2	10	0
0	2	0	18	5	0	0	0	0	5	1	0	10	5	0	0	2	0	0	1	1	0	7	2	8	10	0	6	6	1
17	1	0	33	8	1	0	0	0	4	5	0	9	4	0	0	0	0	0	1	0	0	1	1	6	28	0	6	5	0
3	14	0	25	30	0	0	0	0	5	11	0	4	7	0	0	2	0	0	1	0	0	9	0	7	17	0	3	12	0
0	8	0	8	7	0	4	0	0	5	2	2	18	2	0	7	1	0	0	0	0	0	0	0	12	26	0	5	5	0
1	14	0	5	12	0	0	2	0	2	2	1	10	17	0	0	0	0	0	0	0	0	0	0	4	9	0	6	4	0
1	3	0	19	7	0	0	1	0	0	3	0	16	26	0	0	0	0	0	0	0	0	0	0	9	11	0	2	1	0
0	5	0	4	15	2	0	1	0	2	7	0	12	8	0	0	0	0	0	0	0	0	0	0	13	14	0	3	4	0
1	1	0	14	6	0	0	0	0	0	3	0	17	7	0	0	0	0	0	0	0	0	0	0	19	27	0	10	15	0
4	0	0	13	1	0	1	0	0	4	1	0	13	3	0	0	0	0	0	0	0	0	0	0	6	7	0	3	3	0
0	0	0	18	10	0	0	0	0	2	2	0	24	3	0	1	0	0	0	0	0	0	0	0	10	6	0	1	6	0
3	15	0	9	17	0	1	1	0	3	2	0	9	12	0	0	0	0	0	0	0	0	0	0	14	5	0	0	6	0
0	2	0	3	17	0	3	3	0	0	3	1	4	8	0	0	0	0	0	0	0	0	0	0	2	5	0	1	3	0
2	0	0	2	6	0	0	0	0	3	3	1	0	4	0	0	0	0	0	0	0	0	0	0	2	9	0	6	6	0
0	1	0	7	6	1	1	0	0	3	1	0	19	5	0	12	0	0	0	0	0	0	0	0	10	37	0	2	15	0
2	0	0	8	9	0	0	0	0	1	9	0	25	33	0	12	6	2	0	0	0	0	0	2	16	28	1	5	1	1
0	2	0	9	4	0	0	0	0	2	1	0	9	10	0	8	10	0	0	0	0	0	0	0	3	10	0	1	4	0
2	1	1	3	23	0	0	0	0	1	0	0	17	64	0	8	21	1	0	0	0	0	0	0	14	44	1	2	17	0
1	2	0	11	4	0	2	0	0	0	3	0	11	30	0	5	14	0	0	0	0	0	0	0	4	4	0	1	0	0
3	0	1	2	13	0	0	3	0	0	4	1	5	17	0	15	13	2	0	0	0	0	0	0	7	36	0	0	2	0
2	3	0	6	7	0	0	1	0	0	3	1	20	13	0	6	9	1	0	0	0	0	0	1	3	4	0	1	0	0
2	0	0	15	5	0	0	1	0	1	0	0	21	24	0	7	11	2	0	0	0	0	0	0	6	6	2	0	1	0
4	6	1	4	9	0	1	3	0	2	2	0	0	8	0	2	14	2	0	0	0	0	0	0	13	8	0	4	10	0
0	0	0	6	4	0	0	0	0	1	0	0	0	15	0	15	3	2	0	1	0	0	1	0	6	17	0	2	0	0
3	0	0	11	0	0	0	5	0	0	0	0	12	14	0	1	1	0	1	0	0	0	0	0	8	2	2	2	1	0
0	0	0	0	0	0	0	0	0	0	0	0	0	0	0	0	0	0	0	0	0	0	0	0	0	0	0	0	0	0
0	0	0	0	0	0	0	1	1	0	0	0	0	0	0	0	0	0	0	0	0	0	0	0	0	0	0	0	0	0
0	0	0	0	0	0	0	1	0	0	0	0	0	0	0	0	0	0	0	0	0	0	0	0	0	0	0	0	0	0
0	0	0	0	0	0	0	1	0	0	0	0	0	0	0	0	0	0	0	0	0	0	0	0	0	0	0	0	0	0
0	0	0	0	0	0	0	0	0	0	0	0	0	0	0	0	0	0	0	0	0	0	0	0	0	0	0	0	0	0
0	0	0	0	0	0	0	0	0	0	0	0	0	0	0	0	0	0	0	0	0	0	0	0	0	0	0	0	0	0
0	0	0	0	0	0	0	0	0	0	0	0	0	0	0	2	0	0	0	0	0	0	0	0	0	0	0	0	0	0
0	0	0	0	0	0	0	0	0	0	0	0	0	0	0	0	0	0	0	0	0	0	0	0	0	0	0	0	0	0
0	0	0	0	0	0	0	0	0	0	0	0	0	0	0	0	0	0	0	0	0	0	0	0	0	0	0	0	0	0
0	0	0	0	0	0	0	0	0	0	0	0	0	0	0	0	0	0	0	0	0	0	0	0	0	0	0	0	0	0
0	0	0	0	0	0	0	0	0	1	0	0	0	0	0	0	0	0	0	0	0	0	0	0	0	0	0	0	0	0
0	0	0	0	0	0	0	0	0	0	0	0	0	0	0	0	0	0	0	0	0	0	0	0	0	0	0	0	0	0
0	0	0	0	0	0	0	0	0	0	0	0	0	0	0	0	0	0	0	0	0	0	0	0	0	0	0	0	0	0
0	0	0	0	0	0	0	0	0	0	0	0	0	0	0	2	0	0	0	0	0	0	0	0	2	0	0	0	0	0
0	0	0	0	0	0	0	0	0	12	0	0	0	0	0	3	0	0	0	0	0	0	0	0	8	0	0	0	0	0
0	0	0	2	0	0	0	0	0	0	0	0	0	0	0	0	0	0	0	0	0	0	0	0	4	0	0	0	0	0
0	0	0	0	0	0	0	0	0	0	0	0	0	0	0	0	0	0	0	0	0	0	0	0	0	0	0	0	0	0
0	0	0	0	0	0	0	0	0	0	0	0	0	0	0	0	0	0	0	0	0	0	0	0	0	0	0	0	0	0
0	0	0	0	0	0	0	0	0	0	0	0	0	0	0	0	0	0	0	0	0	0	0	0	0	0	0	0	0	0
0	0	0	0	0	0	0	0	0	0	0	0	0	0	0	0	0	0	0	0	0	0	0	0	0	0	0	0	0	0
0	0	0	0	0	0	0	0	0	0	0	0	0	0	0	0	0	0	0	0	0	0	0	0	0	0	0	0	0	0
0	0	0	0	0	0	0	0	0	0	0	0	0	0	0	2	0	0	0	0	0	0	0	0	0	0	0	0	0	0
0	0	0	0	0	0	0	0	0	0	0	0	0	0	0	0	3	0	0	0	0	0	0	0	0	1	0	0	0	0
0	0	0	0	2	0	0	1	0	0	0	0	0	0	0	0	4	0	0	0	0	0	0	0	0	13	0	0	0	0
0	0	0	0	0	0	1	0	0	0	0	0	0	0	0	0	0	0	0	0	0	0	0	0	3	0	0	0	0	0
0	0	0	0	0	0	0	0	0	0	4	0	0	0	0	1	6	0	0	0	0	0	0	0	0	1	0	0	0	0
0	0	0	0	0	0	0	0	0	1	0	0	0	0	0	0	0	0	0	0	0	0	0	0	0	0	0	0	0	0
0	0	0	0	0	0	0	0	0	0	0	0	0	0	0	7	0	0	0	0	0	0	0	0	3	1	0	4	0	0
0	0	0	0	0	0	0	0	0	0	0	0	0	0	0	0	0	0	0	0	0	0	0	0	4	0	0	1	0	0
0	0	0	0	0	0	0	0	0	1	0	0	0	0	0	0	0	0	0	0	0	0	0	0	1	0	0	0	0	0
0	0	0	1	0	0	0	0	0	0	0	0	0	0	0	0	0	0	0	0	0	0	0	0	0	0	0	0	0	0
0	0	0	0	0	0	0	0	0	0	0	0	0	0	0	0	0	0	0	0	0	0	0	0	0	0	0	0	0	0
0	0	0	0	0	0	0	0	0	0	0	0	0	0	0	0	0	0	0	0	0	0	0	0	0	0	0	0	0	0
0	0	0	8	0	0	0	0	0	0	0	0	0	0	0	0	0	0	0	0	0	0	0	0	1	0	0	0	0	0
0	0	0	0	0	0	0	0	0	1	0	0	0	0	0	0	0	0	0	0	0	0	0	0	0	0	0	0	0	0
0	0	0	5	0	0	0	0	0	2	0	0	0	0	0	0	0	0	0	0	0	0	0	0	0	1	0	0	0	0
0	0	0	0	0	0	0	0	0	0	10	0	0	0	0	3	0	0	0	0	0	0	0	0	0	3	0	0	0	0
0	0	0	0	0	0	0	0	0	0	0	0	0	0	0	1	0	0	0	0	0	0	0	0	1	0	0	0	0	0
0	0	0	0	0	0	0	0	0	0	0	0	0	0	0	1	0	1	0	0	0	0	0	0	0	3	0	0	2	0
0	0	0	0	0	0	0	0	0	1	0	0	0	0	0	0	0	0	0	0	0	0	0	0	0	0	0	0	0	0
0	0	0	0	0	0	0	0	0	0	0	0	0	0	0	0	0	0	0	0	0	0	0	0	3	0	0	0	2	0
0	0	0	2	0	0	0	0	0	1	0	0	0	0	0	0	11	0	0	0	0	1	0	0	0	0	0	0	0	0
0	0	0	0	1	0	0	0	0	0	1	0	0	0	0	0	0	0	0	0	0	0	0	0	0	0	0	1	0	0
0	0	0	1	0	0	0	0	0	1	0	0	0	0	0	0	0	0	0	0	0	0	0	0	1	2	0	0	0	0
1	0	0	2	0	0	0	0	0	0	0	0	1	0	0	4	0	0	1	0	0	5	0	0	0	0	0	0	0	0
0	0	0	5	3	0	0	0	0	6	4	0	0	0	0	0	0	0	0	0	0	0	1	0	0	1	0	0	1	0
0	0	0	1	0	0	0	0	0	0	0	0	0	0	0	1	0	0	0	0	0	0	0	0	0	0	0	0	0	0
0	0	0	0	0	0	0	0	0	5	0	0	0	0	0	1	0	0	0	0	0	1	0	0	0	0	0	0	0	0
0	0	0	0	0	0	0	0	0	0	3	0	0	0	0	0	0	0	0	0	0	1	0	0	0	0	0	0	0	0
0	0	0	0	1	0	0	0	0	0	6	0	0	0	0	40	0	0	0	0	0	0	1	0	0	0	0	1	0	0
1	0	0	0	0	0	0	0	0	1	0	0	0	0	0	0	0	0	0	0	0	0	2	0	0	0	0	0	0	0
1	0	0	1	0	0	0	0	0	0	0	0	1	0	0	0	0	0	0	0	0	0	0	0	0	0	0	0	0	0
0	0	0	1	0	0	0	0	0	0	0	0	3	0	0	0	0	0	0	0	0	0	0	0	0	0	0	0	0	0
0	0	0	0	0	0	0	0	0	10	0	0	1	0	0	0	0	0	0	0	0	0	0	0	0	0	0	0	0	0
0	0	0	4	2	0	0	0	0	0	0	0	0	0	0	0	0	0	1	0	0	0	0	0	1	1	0	0	1	0
0	1	0	0	3	0	0	0	0	0	0	0	0	0	0	0	0	0	0	0	0	0	0	0	0	0	0	0	0	0
3	0	0	1	8	0	0	0	0	0	0	0	0	0	0	0	0	0	0	0	0	0	0	0	0	2	0	0	0	0
0	0	0	0	0	0	0	0	0	0	0	0	0	0	0	0	0	0	0	0	0	0	0	0	0	0	0	0	0	0
0	0	0	1	0	0	0	0	0	0	0	0	1	4	0	0	0	0	0	1	0	0	4	0	0	0	0	0	0	0
0	1	0	0	3	0	0	0	0	1	0	0	0	0	0	0	0	0	0	0	0	0	0	0	0	0	0	0	0	0
3	0	0	0	2	0	0	0	0	2	2	0	1	0	0	0	0	0	1	0	0	0	0	0	1	0	0	0	0	0
0	0	0	0	0	0	0	0	0	0	0	0	0	0	0	0	0	0	0	0	0	0	0	0	1	0	0	0	0	0
0	0	0	0	0	0	0	0	0	0	0	0	0	0	0	0	0	0	0	1	0	1	0	0	5	2	0	0	0	0
0	0	0	0	0	0	0	0	0	0	0	0	0	0	0	0	0	0	0	0	0	0	0	0	1	0	0	2	0	0
0	0	0	0	0	0	0	0	0	0	4	0	0	0	0	0	0	0	0	0	0	0	0	0	0	0	0	3	0	0
2	0	0	2	4	0	0	0	0	0	2	0	1	0	0	0	33	0	0	0	0	1	0	0	0	0	0	0	0	0
0	0	1	1	0	0	0	0	0	0	1	0	0	1	0	0	0	0	0	0	0	1	0	0	0	0	0	0	0	0
0	0	0	0	0	0	0	0	0	0	0	0	0	0	0	0	0	0	0	1	0	0	0	0	1	0	0	1	0	0
0	1	0	2	2	0	0	0	0	0	0	0	0	0	0	0	2	0	0	0	0	0	0	0	0	0	0	9	0	0
0	0	0	3	7	0	1	0	0	1	0	0	0	0	0	0	0	0	1	0	0	0	0	0	9	1	0	2	0	0
2	0	0	17	0	0	0	0	0	2	3	0	0	2	0	0	0	0	0	0	0	3	0	0	3	1	0	19	0	0
0	3	0	0	0	0	0	0	0	1	0	0	1	0	0	0	0	0	0	0	0	0	0	0	8	0	0	1	0	0
0	3	0	3	0	0	0	0	0	0	0	0	0	0	0	0	0	0	0	0	0	0	0	0	15	2	0	8	1	0
0	0	0	0	0	0	0	0	0	2	2	0	1	1	0	0	0	0	0	0	0	0	0	0	0	0	0	1	4	0
0	0	0	0	0	0	0	0	0	1	1	0	0	0	0	0	0	0	0	0	0	0	1	0	0	0	0	4	0	0
0	1	0	4	0	0	0	0	0	0	0	0	0	0	0	0	0	0	0	0	0	0	3	0	4	1	0	5	3	0
0	0	0	5	0	0	0	0	0	0	0	0	1	0	0	0	0	0	0	1	0	2	2	0	3	0	0	3	1	0
0	0	0	1	0	0	0	0	0	10	3	0	0	0	0	2	0	0	0	0	0	0	0	0	5	1	0	2	5	0
0	0	0	2	0	0	0	0	0	0	2	0	0	0	0	2	0	1	0	0	0	0	2	0	5	1	0	1	1	0
0	0	0	0	0	0	1	0	0	0	0	0	0	0	0	2	0	0	0	0	0	0	0	0	9	0	0	3	0	0
0	1	0	2	0	0	0	0	0	0	2	0	2	1	0	7	0	0	0	0	0	3	0	0	4	6	0	5	7	0
0	1	0	0	15	0	0	0	0	7	1	0	0	1	0	6	0	0	0	0	0	0	0	0	8	4	0	2	2	0
0	0	0	6	6	0	0	0	0	0	0	0	0	0	0	2	0	0	0	0	0	0	3	0	8	5	0	5	3	0
0	0	0	0	10	0	0	1	0	2	1	0	2	0	0	4	0	0	0	0	0	0	0	0	16	0	0	2	5	0
0	0	0	0	1	0	0	0	0	0	0	0	0	0	0	7	0	0	0	0	0	0	0	0	8	2	0	4	4	0
0	0	0	0	2	0	1	0	0	0	6	0	1	0	0	3	1	0	0	0	0	1	0	0	10	4	0	5	2	0
0	0	0	12	3	0	0	0	0	0	1	0	0	0	0	15	0	0	0	0	0	0	0	0	9	0	0	0	0	0
0	0	0	7	1	0	0	1	0	1	1	1	1	1	0	13	2	1	1	0	0	2	0	0	10	3	0	3	7	0
1	0	0	16	0	0	0	0	0	2	0	0	0	0	0	27	1	0	0	0	0	0	0	0	18	3	0	1	8	0
0	0	0	13	3	1	0	0	0	2	0	0	1	1	0	13	4	0	2	0	0	0	0	0	9	26	0	5	12	0
0	0	0	0	2	1	0	0	0	2	5	0	0	0	0	5	3	0	0	1	0	0	3	0	9	4	0	0	0	0
0	0	0	1	0	1	0	0	0	6	1	0	0	0	0	20	9	0	0	0	0	6	0	0	17	21	0	2	11	0
1	0	0	6	0	0	0	1	0	2	4	0	0	1	0	20	3	0	1	0	0	0	0	0	19	15	0	6	4	0
2	0	0	14	0	0	0	0	0	8	3	0	1	1	0	1	8	1	2	0	0	0	0	0	21	11	0	8	2	0
0	0	0	0	0	0	1	0	0	2	3	0	1	2	0	6	5	0	0	0	0	0	0	0	16	6	0	0	4	0
1	0	0	2	1	0	0	0	0	0	1	0	0	1	0	15	1	0	0	0	0	0	0	0	53	9	0	5	1	0
2	1	0	6	24	0	0	0	0	20	0	0	1	0	0	9	0	0	1	0	0	3	1	0	24	3	0	12	1	0
2	0	0	2	13	0	0	0	0	5	5	0	2	1	0	14	49	2	2	0	0	0	1	0	24	28	0	12	5	0
0	0	0	3	19	1	0	0	0	17	1	0	2	0	0	6	0	0	0	0	0	1	0	1	39	2	1	7	1	0
0	0	0	3	5	1	0	0	0	7	5	0	3	0	0	3	2	0	2	0	0	3	0	0	51	12	0	13	0	0
4	2	0	3	9	1	0	0	0	10	9	0	7	1	0	10	0	0	0	0	0	10	0	0	35	19	0	8	5	0
1	1	0	3	5	0	0	1	0	4	4	1	9	0	0	14	62	0	3	0	0	4	0	0	58	24	0	10	5	0
0	1	0	1	2	0	0	0	0	8	0	0	9	0	0	19	3	0	1	0	0	3	0	0	69	21	0	2	3	0
0	1	0	3	7	1	0	0	0	2	10	0	0	1	0	11	10	1	0	1	0	3	7	0	25	18	0	20	2	0
1	0	0	0	2	0	0	0	0	0	3	2	15	0	0	17	6	1	0	4	0	0	0	0	70	33	0	3	11	0
1	2	0	3	0	0	0	0	0	22	0	0	6	0	0	2	0	0	2	1	0	7	1	0	48	30	0	13	12	0
5	2	0	3	6	0	0	0	0	7	3	0	1	0	0	9	9	1	2	2	0	28	6	0	16	42	0	1	8	0
8	1	0	5	0	0	0	0	0	19	1	0	3	0	0	28	2	0	1	2	0	15	8	0	86	38	0	28	4	0
0	0	0	3	6	0	0	0	0	4	8	0	5	8	0	16	18	0	3	1	0	7	0	0	46	30	0	20	12	0
2	4	0	7	0	2	0	0	0	8	5	0	3	6	0	20	16	0	2	4	0	2	4	0	90	0	0	18	0	0
0	1	0	4	3	1	0	0	0	3	3	1	0	9	0	8	0	1	1	0	0	0	7	1	39	0	0	8	0	0
5	0	0	3	1	0	0	0	0	3	33	0	17	8	0	5	23	1	0	0	0	2	10	0	88	75	0	26	12	0
8	0	0	2	0	1	0	0	0	6	9	0	5	11	0	8	3	1	0	0	0	1	4	0	64	1	0	4	0	0
0	0	0	0	0	0	0	0	0	9	11	0	10	3	0	9	28	1	0	1	0	0	3	0	45	122	0	22	19	0
7	0	0	45	0	2	0	0	0	6	8	0	1	4	0	11	6	0	6	1	0	17	4	0	61	50	0	28	13	0
2	2	0	10	1	3	0	0	0	0	1	0	1	0	0	13	11	1	2	0	0	19	2	1	90	46	0	32	12	0
7	4	0	15	0	0	0	0	0	2	11	0	5	3	0	17	0	0	2	0	0	19	0	0	39	10	1	23	0	0
4	0	0	61	0	1	0	0	0	5	0	0	2	1	0	17	26	0	2	0	0	30	5	1	133	3	0	29	13	0
2	0	0	9	3	1	0	0	0	2	8	1	3	11	0	6	10	0	4	4	0	8	9	0	102	51	0	19	3	0
0	0	0	21	0	1	0	0	0	7	12	1	4	0	0	14	1	1	2	2	0	8	4	0	66	44	0	39	1	0
4	2	0	10	5	0	0	0	0	2	7	0	4	13	0	13	0	1	0	1	0	8	7	1	71	37	0	11	24	0
2	3	0	9	1	0	0	0	0	2	2	0	2	13	0	35	0	0	0	1	0	27	2	0	26	15	0	23	1	0
4	0	0	66	0	0	0	0	0	14	0	0	0	0	0	10	0	0	3	2	0	44	1	0	48	59	0	0	20	0
1	0	0	10	1	0	0	0	0	3	10	0	18	4	0	14	0	0	3	0	0	12	0	0	94	36	0	27	29	0
7	0	0	22	1	1	0	0	0	4	3	0	14	1	0	32	0	0	0	1	0	23	25	0	115	43	1	15	1	0
21	3	0	9	14	0	123	208	0	1	1	0	21	5	0	29	30	2	3	2	0	14	7	0	28	69	0	24	32	0
1	3	0	16	12	1	141	290	0	3	1	0	0	2	0	23	22	1	1	1	0	27	7	0	46	76	0	18	24	0
0	1	0	37	4	1	81	296	0	4	1	0	23	4	0	63	11	1	2	0	0	9	16	0	61	66	0	10	24	0
0	10	0	16	50	0	69	167	1	4	3	0	1	3	0	43	20	0	4	1	0	9	2	0	26	61	0	15	21	0
10	8	0	12	62	0	74	50	0	2	2	0	5	4	0	46	0	0	1	4	0	15	5	0	49	36	0	21	18	0
16	2	0	19	37	0	44	85	0	2	1	0	21	2	0	29	1	0	0	1	0	7	21	0	44	34	0	12	25	0
12	6	0	19	20	0	18	115	0	3	1	0	4	7	0	10	41	1	1	1	0	43	6	1	48	70	0	19	19	0
0	14	0	9	27	1	29	202	0	2	10	1	22	0	0	44	35	0	2	0	0	25	0	1	71	58	0	8	24	0
7	0	0	6	8	1	67	159	0	4	2	0	8	7	0	79	30	1	0	2	0	22	3	1	70	91	0	4	10	0
3	0	0	6	19	0	53	74	0	2	1	1	18	4	0	67	46	0	0	1	0	22	14	0	26	69	0	26	10	0
0	8	0	1	15	0	52	17	0	0	0	1	4	18	0	41	24	2	1	0	0	2	2	0	69	26	0	11	15	0
0	16	0	2	7	1	40	40	0	1	0	0	4	0	0	34	2	1	1	0	0	3	5	0	80	44	0	17	15	0
0	4	0	2	14	0	33	11	0	3	1	1	6	12	0	36	48	1	0	0	0	0	3	0	23	25	0	24	21	0
1	7	0	3	15	0	27	51	0	2	1	0	25	1	0	35	32	0	0	1	0	6	20	0	69	53	0	2	12	0
2	0	0	6	12	0	42	14	0	1	1	0	17	11	0	44	33	1	0	7	0	3	67	0	33	37	0	11	6	0
1	0	0	10	13	0	32	248	0	3	3	0	20	4	0	51	12	0	0	2	0	5	0	0	39	68	0	23	15	0
2	0	0	12	11	0	49	80	0	1	2	1	10	16	0	28	36	1	0	0	0	1	1	2	63	77	0	11	8	0
1	0	0	7	15	0	32	51	0	4	2	1	1	4	0	58	87	0	0	0	0	7	69	1	29	48	0	10	24	0
0	0	0	0	10	0	2	3	0	2	1	0	2	0	0	4	0	0	0	0	0	0	0	0	16	0	0	2	5	0
0	0	0	0	1	0	3	0	0	0	0	0	0	0	0	7	0	0	0	0	0	0	0	0	8	2	0	4	4	0
0	0	0	0	2	0	11	2	0	0	6	0	1	0	0	3	1	0	0	0	0	1	0	0	10	4	0	5	2	0
0	0	0	12	3	0	10	0	0	0	1	0	0	0	0	15	0	0	0	0	0	0	0	0	9	0	0	0	0	0
0	0	0	7	1	0	19	5	0	1	1	1	1	1	0	13	2	1	1	0	0	2	0	0	10	3	0	3	7	0
1	0	0	16	0	0	4	3	0	2	0	0	0	0	0	27	1	0	0	0	0	0	0	0	18	3	0	1	8	0
0	0	0	13	3	1	4	3	0	2	0	0	1	1	0	13	4	0	2	0	0	0	0	0	9	26	0	5	12	0
0	0	0	0	2	1	13	1	0	2	5	0	0	0	0	5	3	0	0	1	0	0	3	0	9	4	0	0	0	0
0	0	0	1	0	1	18	2	0	6	1	0	0	0	0	20	9	0	0	0	0	6	0	0	17	21	0	2	11	0
1	0	0	6	0	0	50	5	0	2	4	0	0	1	0	20	3	0	1	0	0	0	0	0	19	15	0	6	4	0
2	0	0	14	0	0	28	1	0	8	3	0	1	1	0	1	8	1	2	0	0	0	0	0	21	11	0	8	2	0
0	0	0	0	0	0	39	2	0	2	3	0	1	2	0	6	5	0	0	0	0	0	0	0	16	6	0	0	4	0
1	0	0	2	1	0	9	3	0	0	1	0	0	1	0	15	1	0	0	0	0	0	0	0	53	9	0	5	1	0
2	1	0	6	24	0	53	13	0	20	0	0	1	0	0	9	0	0	1	0	0	3	1	0	24	3	0	12	1	0
2	0	0	2	13	0	55	0	0	5	5	0	2	1	0	14	49	2	2	0	0	0	1	0	24	28	0	12	5	0
0	0	0	3	19	1	77	7	0	17	1	0	2	0	0	6	0	0	0	0	0	1	0	1	39	2	1	7	1	0
0	0	0	3	5	1	58	10	0	7	5	0	3	0	0	3	2	0	2	0	0	3	0	0	51	12	0	13	0	0
4	2	0	3	9	1	99	23	0	10	9	0	7	1	0	10	0	0	0	0	0	10	0	0	35	19	0	8	5	0
1	1	0	3	5	0	28	11	0	4	4	1	9	0	0	14	62	0	3	0	0	4	0	0	58	24	0	10	5	0
0	1	0	1	2	0	110	46	0	8	0	0	9	0	0	19	3	0	1	0	0	3	0	0	69	21	0	2	3	0
0	1	0	3	7	1	59	45	0	2	10	0	0	1	0	11	10	1	0	1	0	3	7	0	25	18	0	20	2	0
1	0	0	0	2	0	79	31	1	0	3	2	15	0	0	17	6	1	0	4	0	0	0	0	70	33	0	3	11	0
1	2	0	3	0	0	91	41	2	22	0	0	6	0	0	2	0	0	2	1	0	7	1	0	48	30	0	13	12	0
5	2	0	3	6	0	45	28	2	7	3	0	1	0	0	9	9	1	2	2	0	28	6	0	16	42	0	1	8	0
8	1	0	5	0	0	46	39	0	19	1	0	3	0	0	28	2	0	1	2	0	15	8	0	86	38	0	28	4	0
0	0	0	3	6	0	58	2	0	4	8	0	5	8	0	16	18	0	3	1	0	7	0	0	46	30	0	20	12	0
2	4	0	7	0	2	234	13	0	8	5	0	3	6	0	20	16	0	2	4	0	2	4	0	90	0	0	18	0	0
0	1	0	4	3	1	120	19	0	3	3	1	0	9	0	8	0	1	1	0	0	0	7	1	39	0	0	8	0	0
5	0	0	3	1	0	166	121	0	3	33	0	17	8	0	5	23	1	0	0	0	2	10	0	88	75	0	26	12	0
8	0	0	2	0	1	144	35	0	6	9	0	5	11	0	8	3	1	0	0	0	1	4	0	64	1	0	4	0	0
0	0	0	0	0	0	78	106	0	9	11	0	10	3	0	9	28	1	0	1	0	0	3	0	45	122	0	22	19	0
7	0	0	45	0	2	81	62	1	6	8	0	1	4	0	11	6	0	6	1	0	17	4	0	61	50	0	28	13	0
2	2	0	10	1	3	60	60	1	0	1	0	1	0	0	13	11	1	2	0	0	19	2	1	90	46	0	32	12	0
7	4	0	15	0	0	125	29	0	2	11	0	5	3	0	17	0	0	2	0	0	19	0	0	39	10	1	23	0	0
4	0	0	61	0	1	177	41	0	5	0	0	2	1	0	17	26	0	2	0	0	30	5	1	133	3	0	29	13	0
2	0	0	9	3	1	65	30	0	2	8	1	3	11	0	6	10	0	4	4	0	8	9	0	102	51	0	19	3	0
0	0	0	21	0	1	0	0	0	7	12	1	4	0	0	14	1	1	2	2	0	8	4	0	66	44	0	39	1	0
4	2	0	10	5	0	0	0	0	2	7	0	4	13	0	13	0	1	0	1	0	8	7	1	71	37	0	11	24	0
2	3	0	9	1	0	0	0	0	2	2	0	2	13	0	35	0	0	0	1	0	27	2	0	26	15	0	23	1	0
4	0	0	66	0	0	0	0	0	14	0	0	0	0	0	10	0	0	3	2	0	44	1	0	48	59	0	0	20	0
1	0	0	10	1	0	0	0	0	3	10	0	18	4	0	14	0	0	3	0	0	12	0	0	94	36	0	27	29	0
7	0	0	22	1	1	0	0	0	4	3	0	14	1	0	32	0	0	0	1	0	23	25	0	115	43	1	15	1	0
21	3	0	9	14	0	0	0	0	1	1	0	21	5	0	29	30	2	3	2	0	14	7	0	28	69	0	24	32	0
1	3	0	16	12	1	0	0	0	3	1	0	0	2	0	23	22	1	1	1	0	27	7	0	46	76	0	18	24	0
0	1	0	37	4	1	0	0	0	4	1	0	23	4	0	63	11	1	2	0	0	9	16	0	61	66	0	10	24	0
0	10	0	16	50	0	0	0	0	4	3	0	1	3	0	43	20	0	4	1	0	9	2	0	26	61	0	15	21	0
10	8	0	12	62	0	0	0	0	2	2	0	5	4	0	46	0	0	1	4	0	15	5	0	49	36	0	21	18	0
16	2	0	19	37	0	0	0	0	2	1	0	21	2	0	29	1	0	0	1	0	7	21	0	44	34	0	12	25	0
12	6	0	19	20	0	0	0	0	3	1	0	4	7	0	10	41	1	1	1	0	43	6	1	48	70	0	19	19	0
0	14	0	9	27	1	0	0	0	2	10	1	22	0	0	44	35	0	2	0	0	25	0	1	71	58	0	8	24	0
7	0	0	6	8	1	0	0	0	4	2	0	8	7	0	79	30	1	0	2	0	22	3	1	70	91	0	4	10	0
3	0	0	6	19	0	0	0	0	2	1	1	18	4	0	67	46	0	0	1	0	22	14	0	26	69	0	26	10	0
0	8	0	1	15	0	0	0	0	0	0	1	4	18	0	41	24	2	1	0	0	2	2	0	69	26	0	11	15	0
0	16	0	2	7	1	0	0	0	1	0	0	4	0	0	34	2	1	1	0	0	3	5	0	80	44	0	17	15	0
0	4	0	2	14	0	0	0	0	3	1	1	6	12	0	36	48	1	0	0	0	0	3	0	23	25	0	24	21	0
1	7	0	3	15	0	0	0	0	2	1	0	25	1	0	35	32	0	0	1	0	6	20	0	69	53	0	2	12	0
2	0	0	6	12	0	0	0	0	1	1	0	17	11	0	44	33	1	0	7	0	3	67	0	33	37	0	11	6	0
1	0	0	10	13	0	0	0	0	3	3	0	20	4	0	51	12	0	0	2	0	5	0	0	39	68	0	23	15	0
2	0	0	12	11	0	0	0	0	1	2	1	10	16	0	28	36	1	0	0	0	1	1	2	63	77	0	11	8	0
1	0	0	7	15	0	0	0	0	4	2	1	1	4	0	58	87	0	0	0	0	7	69	1	29	48	0	10	24	0
0	16	0	3	3	0	0	0	0	0	2	1	2	8	0	32	0	0	1	2	0	0	3	1	41	45	0	8	2	0
0	0	0	0	0	0	0	0	0	9	11	0	10	3	0	9	28	1	0	1	0	0	3	0	45	122	0	22	19	0
7	0	0	45	0	2	0	0	0	6	8	0	1	4	0	11	6	0	6	1	0	17	4	0	61	50	0	28	13	0
2	2	0	10	1	3	0	0	0	0	1	0	1	0	0	13	11	1	2	0	0	19	2	1	90	46	0	32	12	0
7	4	0	15	0	0	0	0	0	2	11	0	5	3	0	17	0	0	2	0	0	19	0	0	39	10	1	23	0	0
4	0	0	61	0	1	0	0	0	5	0	0	2	1	0	17	26	0	2	0	0	30	5	1	133	3	0	29	13	0
2	0	0	9	3	1	0	0	0	2	8	1	3	11	0	6	10	0	4	4	0	8	9	0	102	51	0	19	3	0
0	0	0	21	0	1	0	0	0	7	12	1	4	0	0	14	1	1	2	2	0	8	4	0	66	44	0	39	1	0
4	2	0	10	5	0	0	0	0	2	7	0	4	13	0	13	0	1	0	1	0	8	7	1	71	37	0	11	24	0
2	3	0	9	1	0	0	0	0	2	2	0	2	13	0	35	0	0	0	1	0	27	2	0	26	15	0	23	1	0
4	0	0	66	0	0	0	0	0	14	0	0	0	0	0	10	0	0	3	2	0	44	1	0	48	59	0	0	20	0
1	0	0	10	1	0	0	0	0	3	10	0	18	4	0	14	0	0	3	0	0	12	0	0	94	36	0	27	29	0
7	0	0	22	1	1	0	0	0	4	3	0	14	1	0	32	0	0	0	1	0	23	25	0	115	43	1	15	1	0
21	3	0	9	14	0	0	0	0	1	1	0	21	5	0	29	30	2	3	2	0	14	7	0	28	69	0	24	32	0
1	3	0	16	12	1	0	0	0	3	1	0	0	2	0	23	22	1	1	1	0	27	7	0	46	76	0	18	24	0
0	1	0	37	4	1	0	0	0	4	1	0	23	4	0	63	11	1	2	0	0	9	16	0	61	66	0	10	24	0
0	10	0	16	50	0	0	0	0	4	3	0	1	3	0	43	20	0	4	1	0	9	2	0	26	61	0	15	21	0
10	8	0	12	62	0	74	50	0	2	2	0	5	4	0	46	0	0	1	4	0	15	5	0	49	36	0	21	18	0
16	2	0	19	37	0	44	85	0	2	1	0	21	2	0	29	1	0	0	1	0	7	21	0	44	34	0	12	25	0
12	6	0	19	20	0	18	115	0	3	1	0	4	7	0	10	41	1	1	1	0	43	6	1	48	70	0	19	19	0
0	0	0	2	0	0	1	7	0	0	2	0	0	0	0	2	0	1	0	0	0	0	2	0	5	1	0	1	1	0
0	0	0	0	0	0	6	2	0	0	0	0	0	0	0	2	0	0	0	0	0	0	0	0	9	0	0	3	0	0
0	1	0	2	0	0	1	0	0	0	2	0	2	1	0	7	0	0	0	0	0	3	0	0	4	6	0	5	7	0
0	1	0	0	15	0	0	11	0	7	1	0	0	1	0	6	0	0	0	0	0	0	0	0	8	4	0	2	2	0
0	0	0	6	6	0	10	3	0	0	0	0	0	0	0	2	0	0	0	0	0	0	3	0	8	5	0	5	3	0
0	0	0	0	10	0	2	3	0	2	1	0	2	0	0	4	0	0	0	0	0	0	0	0	16	0	0	2	5	0
0	0	0	0	1	0	3	0	0	0	0	0	0	0	0	7	0	0	0	0	0	0	0	0	8	2	0	4	4	0
0	0	0	0	2	0	11	2	0	0	6	0	1	0	0	3	1	0	0	0	0	1	0	0	10	4	0	5	2	0
0	0	0	12	3	0	10	0	0	0	1	0	0	0	0	15	0	0	0	0	0	0	0	0	9	0	0	0	0	0
0	0	0	7	1	0	19	5	0	1	1	1	1	1	0	13	2	1	1	0	0	2	0	0	10	3	0	3	7	0
1	0	0	16	0	0	4	3	0	2	0	0	0	0	0	27	1	0	0	0	0	0	0	0	18	3	0	1	8	0
0	0	0	13	3	1	4	3	0	2	0	0	1	1	0	13	4	0	2	0	0	0	0	0	9	26	0	5	12	0
0	0	0	0	2	1	13	1	0	2	5	0	0	0	0	5	3	0	0	1	0	0	3	0	9	4	0	0	0	0
0	0	0	1	0	1	18	2	0	6	1	0	0	0	0	20	9	0	0	0	0	6	0	0	17	21	0	2	11	0
1	0	0	6	0	0	50	5	0	2	4	0	0	1	0	20	3	0	1	0	0	0	0	0	19	15	0	6	4	0
2	0	0	14	0	0	28	1	0	8	3	0	1	1	0	1	8	1	2	0	0	0	0	0	21	11	0	8	2	0
0	0	0	0	0	0	39	2	0	2	3	0	1	2	0	6	5	0	0	0	0	0	0	0	16	6	0	0	4	0
1	0	0	2	1	0	9	3	0	0	1	0	0	1	0	15	1	0	0	0	0	0	0	0	53	9	0	5	1	0
2	1	0	6	24	0	53	13	0	20	0	0	1	0	0	9	0	0	1	0	0	3	1	0	24	3	0	12	1	0
2	0	0	2	13	0	55	0	0	5	5	0	2	1	0	14	49	2	2	0	0	0	1	0	24	28	0	12	5	0
0	0	0	3	19	1	77	7	0	17	1	0	2	0	0	6	0	0	0	0	0	1	0	1	39	2	1	7	1	0
